# Supplementary material for: Systematic study on free radical hydrothiolation of unsaturated monosaccharide derivatives with exo- and endocyclic double bonds
Source: Royal Society of Chemistry journal article supplement (doi:10.1039/c3ob40547h), 2013-01-01

## **Systematic study on free radical hydrothiolation of unsaturated monosaccharide derivatives with exo- and endocyclic double bonds**

László Lázár,<sup>a</sup> Magdolna Csávás,<sup>b</sup> Ádám Hadházi,<sup>b</sup> Mihály Herczeg,<sup>a,c</sup> Marietta Tóth,<sup>c</sup> László Somsák,<sup>c</sup> Terézia Barna,<sup>d</sup> Pál Herczegh<sup>b</sup> and Anikó Borbás\*<sup>a,b</sup>

<sup>a</sup>*Research Group for Carbohydrates, University of Debrecen, H-4010 Debrecen, PO Box 94, Hungary,*

<sup>b</sup>*Department of Pharmaceutical Chemistry, Medical and Health Science Center, University of Debrecen, H-4010 Debrecen, PO Box 70, Hungary,*

<sup>c</sup>*Department of Organic Chemistry, University of Debrecen, H-4010 Debrecen, PO Box 20, Hungary,*

<sup>d</sup>*Department of Genetics and Applied Microbiology, University of Debrecen, 4032 Debrecen, Hungary*

### **NMR spectra**

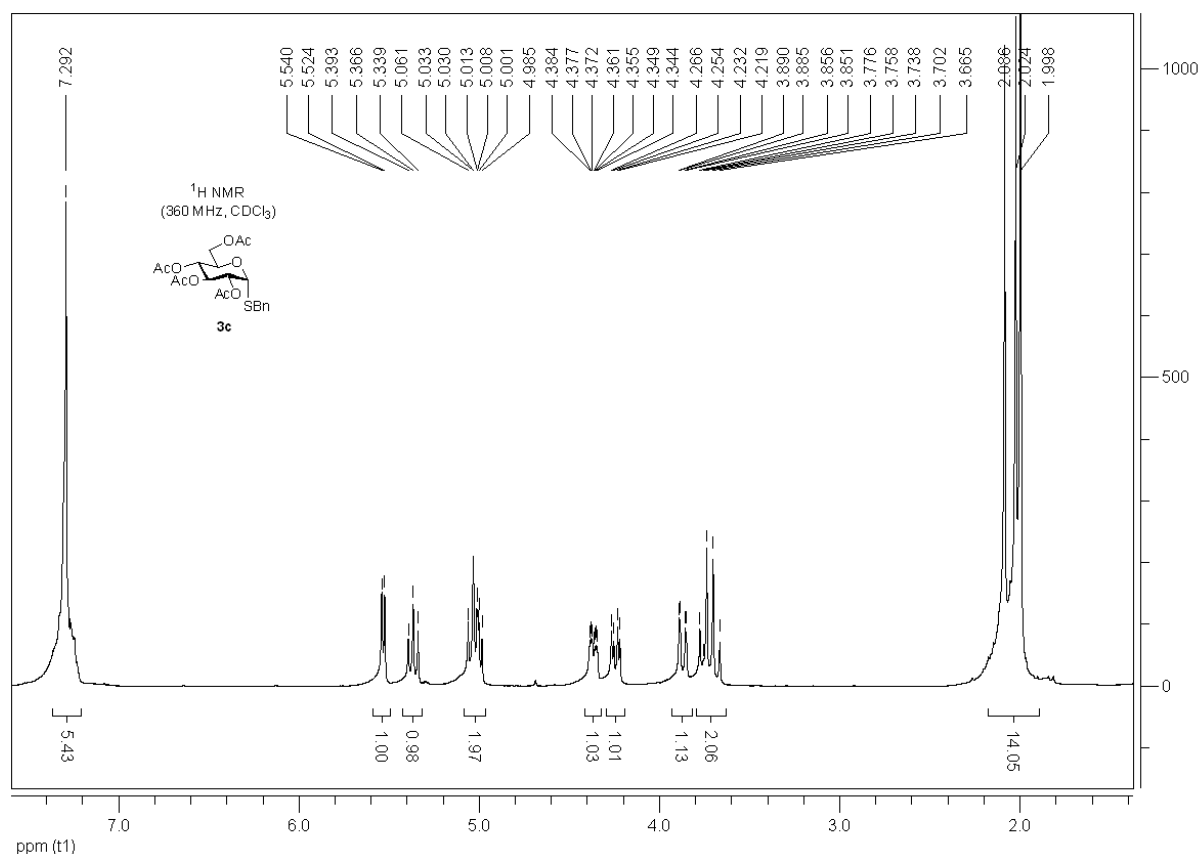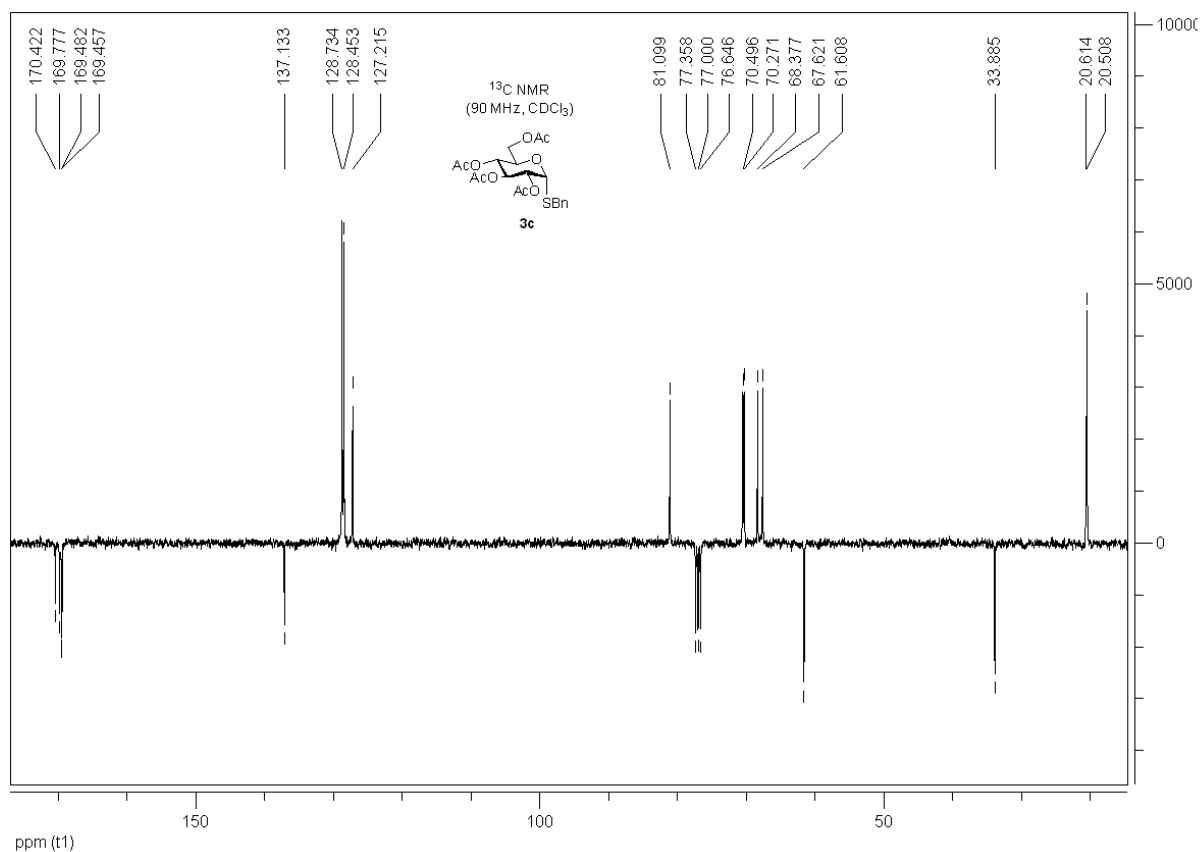

<sup>1</sup>H NMR analysis of the reaction of **1** and **2c** in different solvents

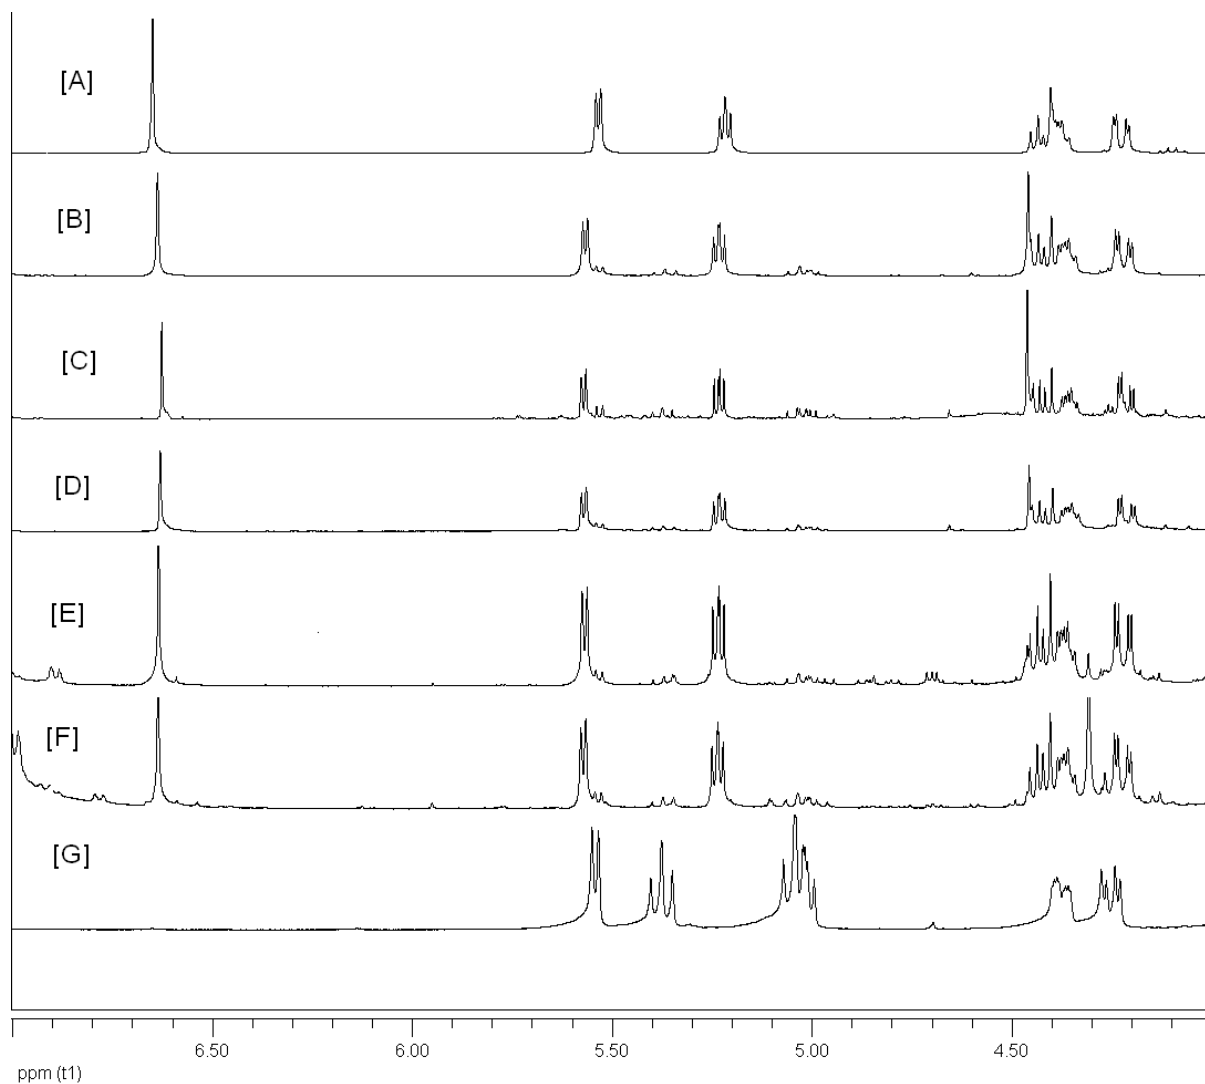

[A]: <sup>1</sup>H NMR spectrum of **1**

[B]- [E]: <sup>1</sup>H NMR spectra of the crude reaction mixtures after 3 x 15 min photolysis of **1** and **2c** in different solvents; [B]: toluene, [C]: MeOH, [D]: CH<sub>2</sub>Cl<sub>2</sub>, [E]: DMF, [F]: DMF-H<sub>2</sub>O, 1:1

[G]: <sup>1</sup>H NMR spectrum of pure isolated **3c**

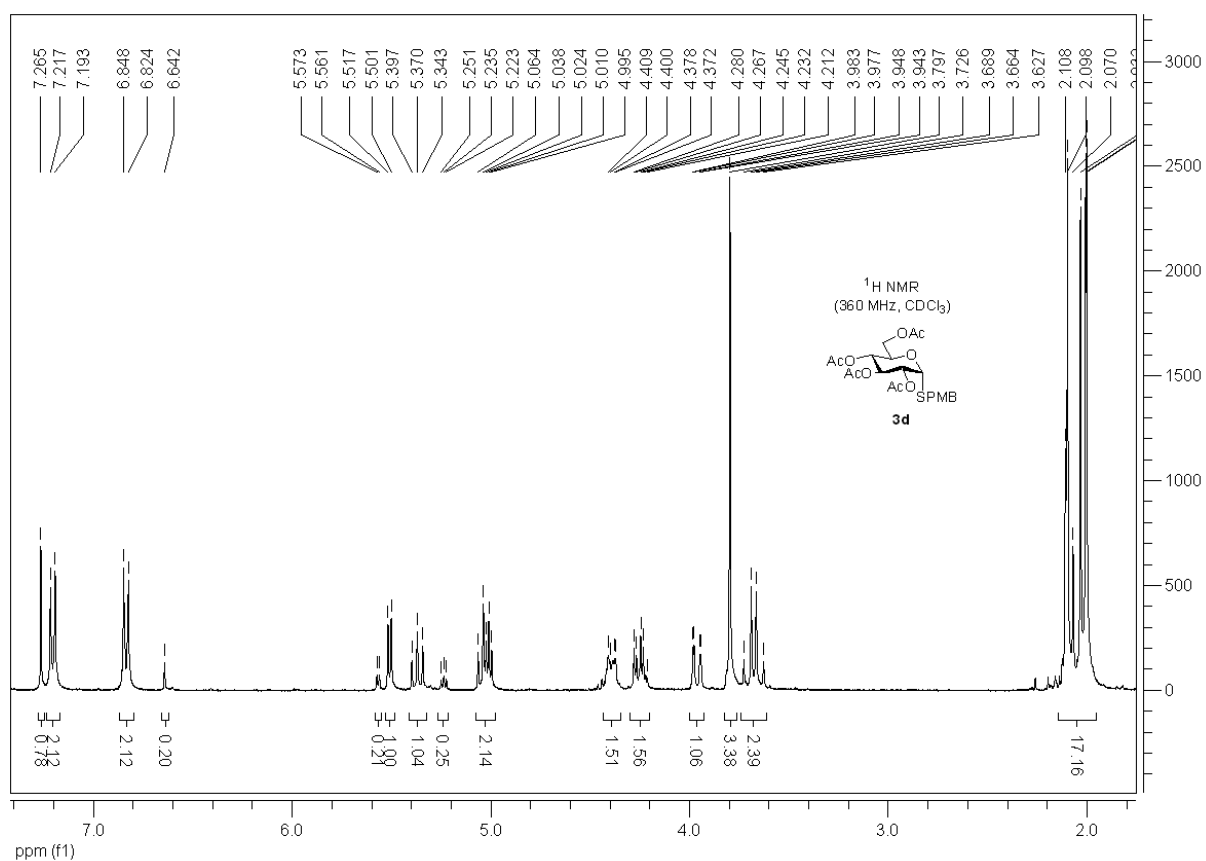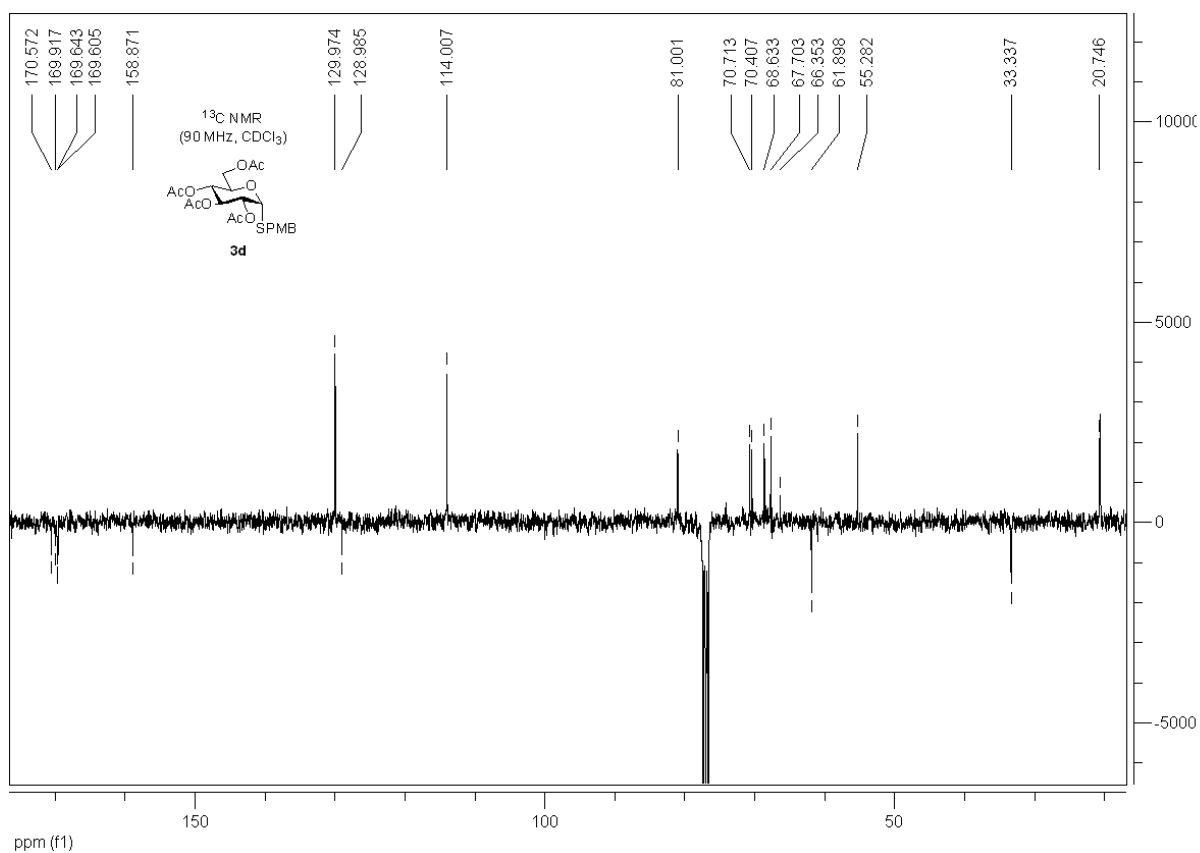

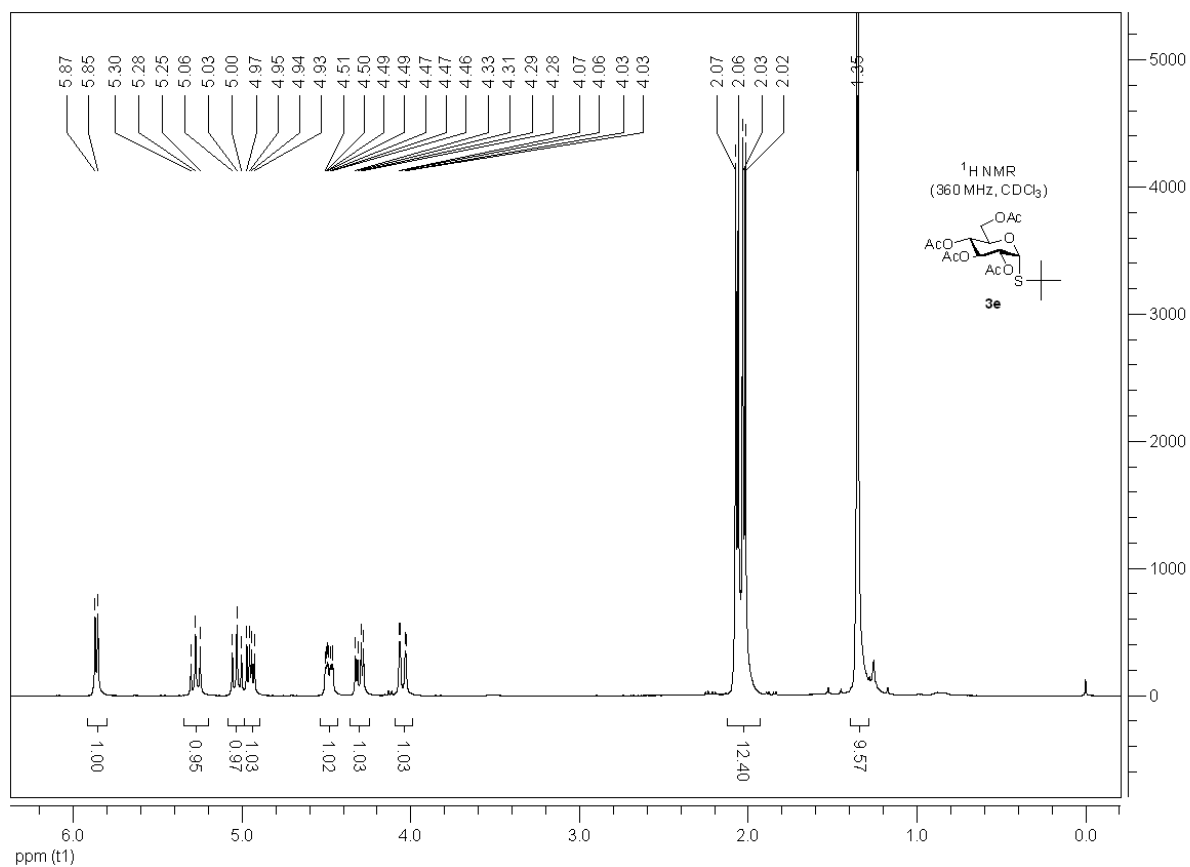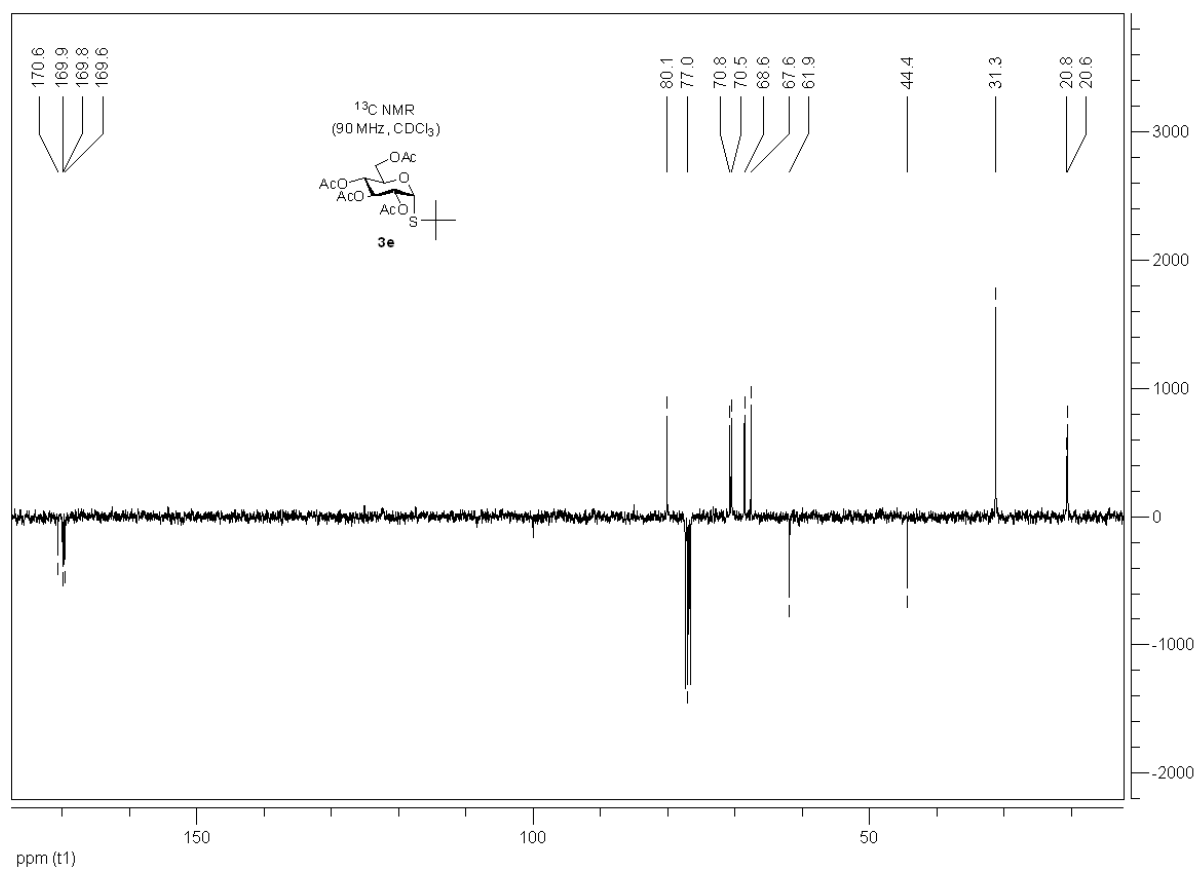

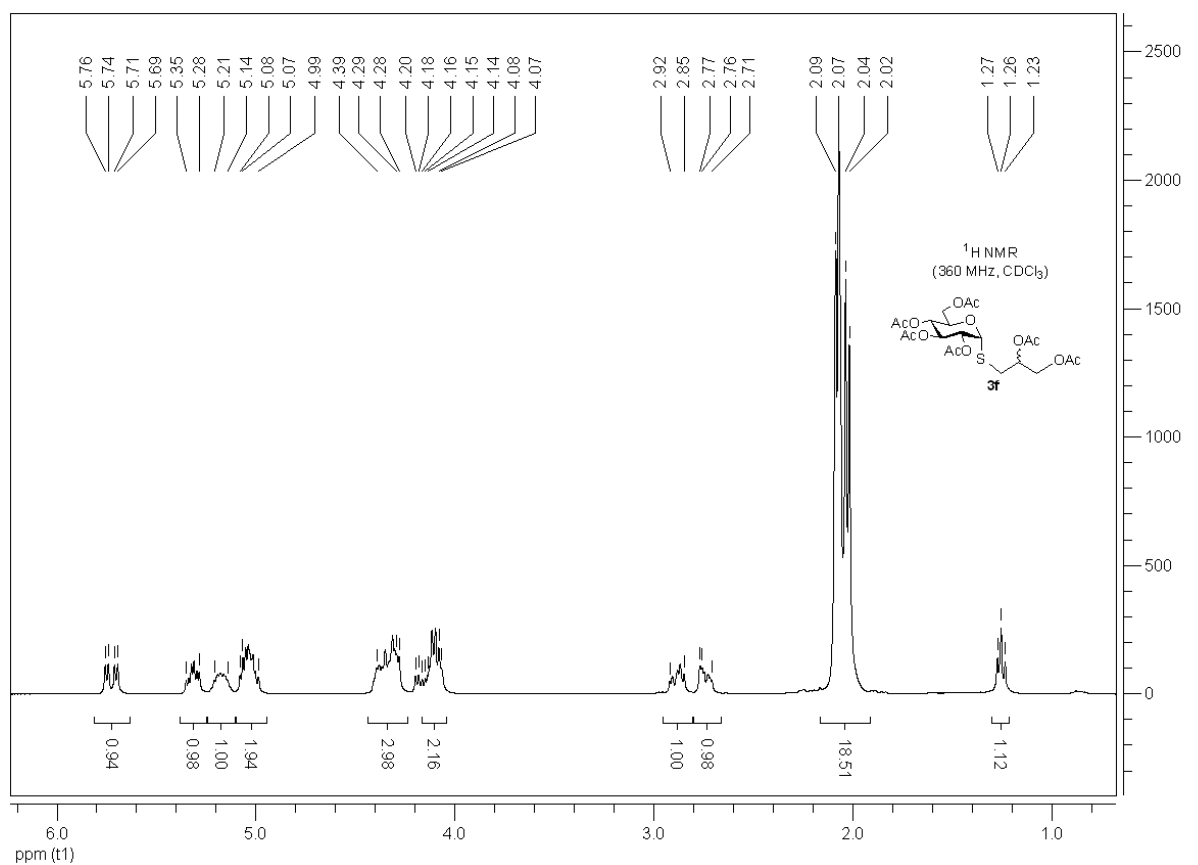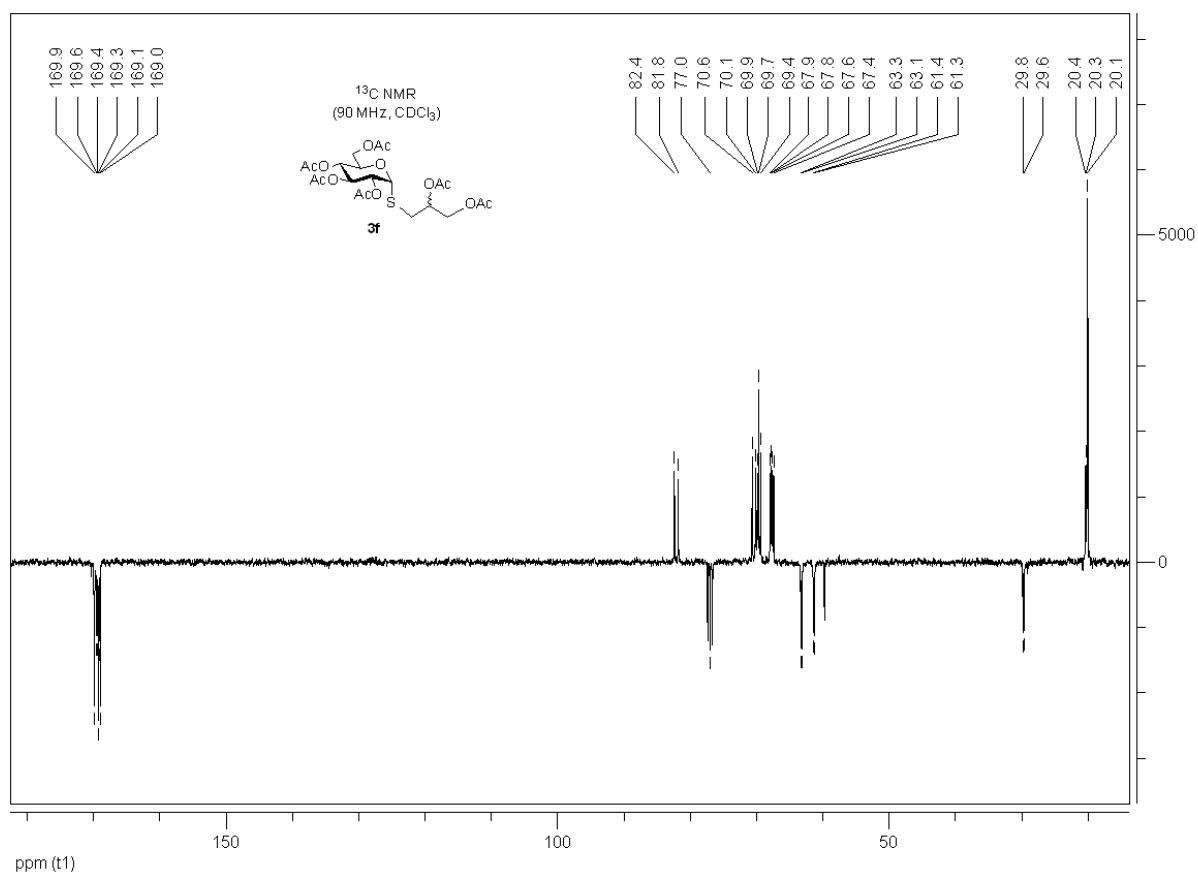

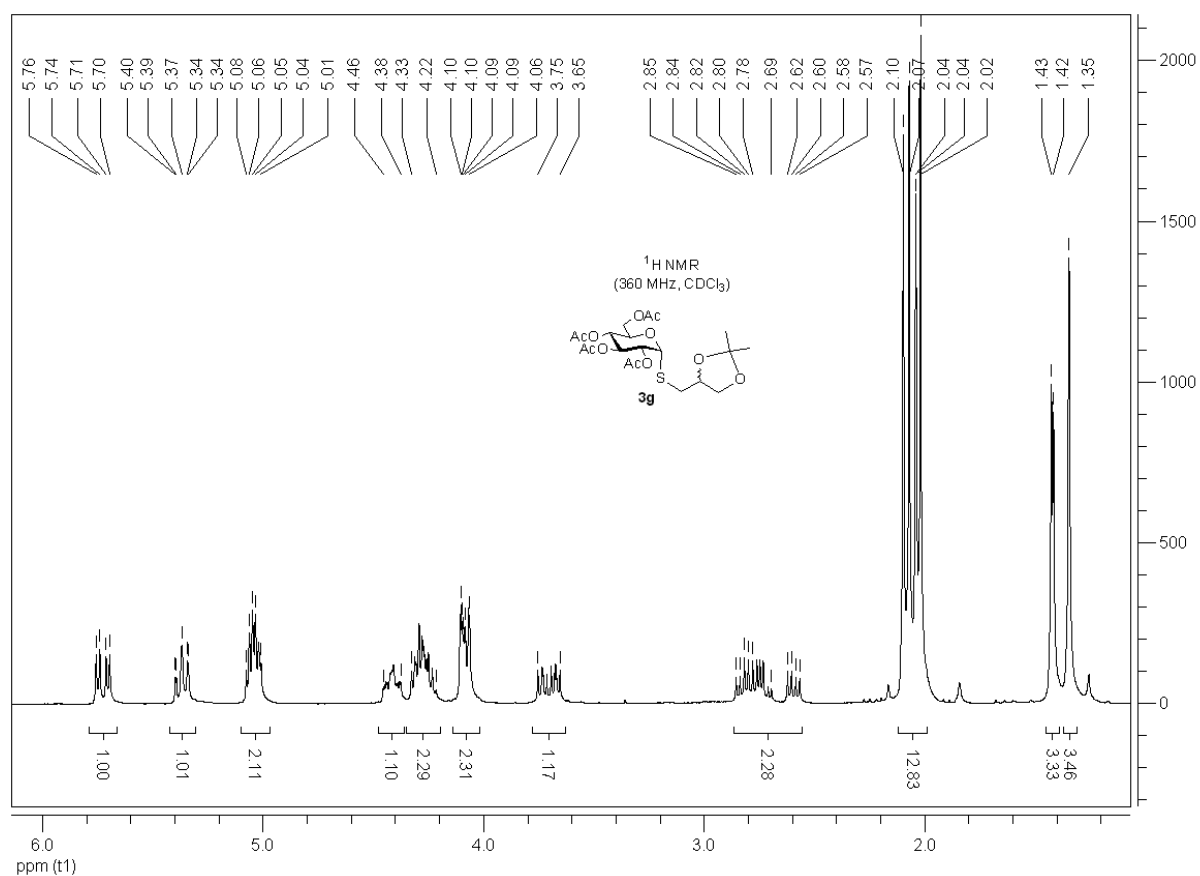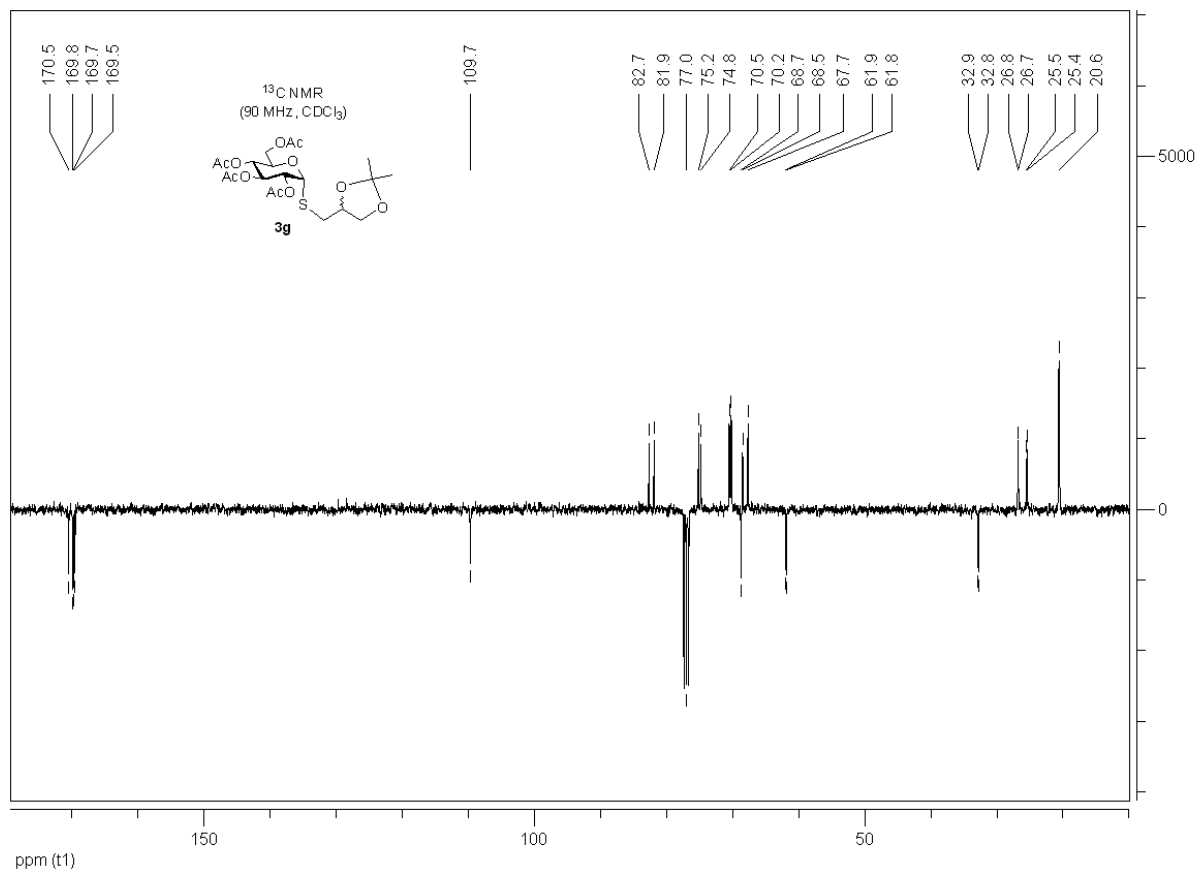

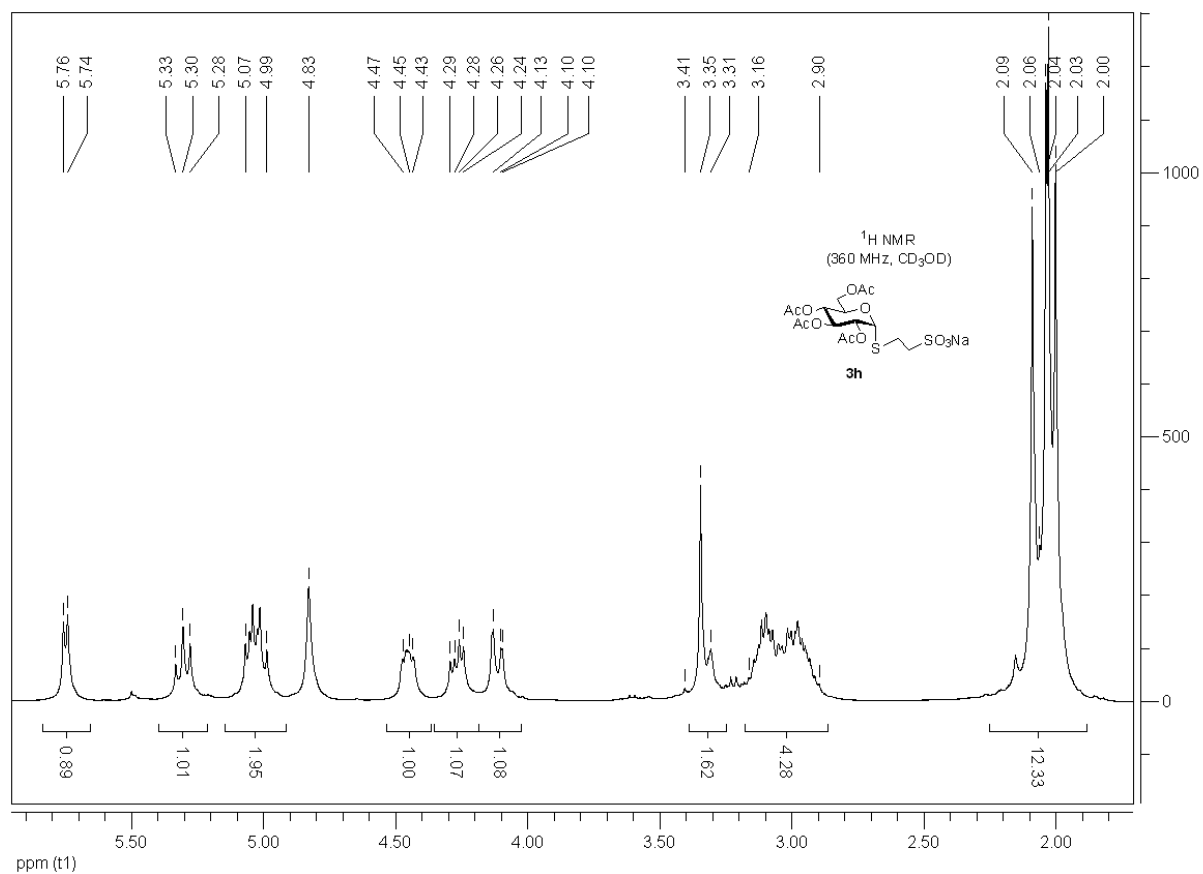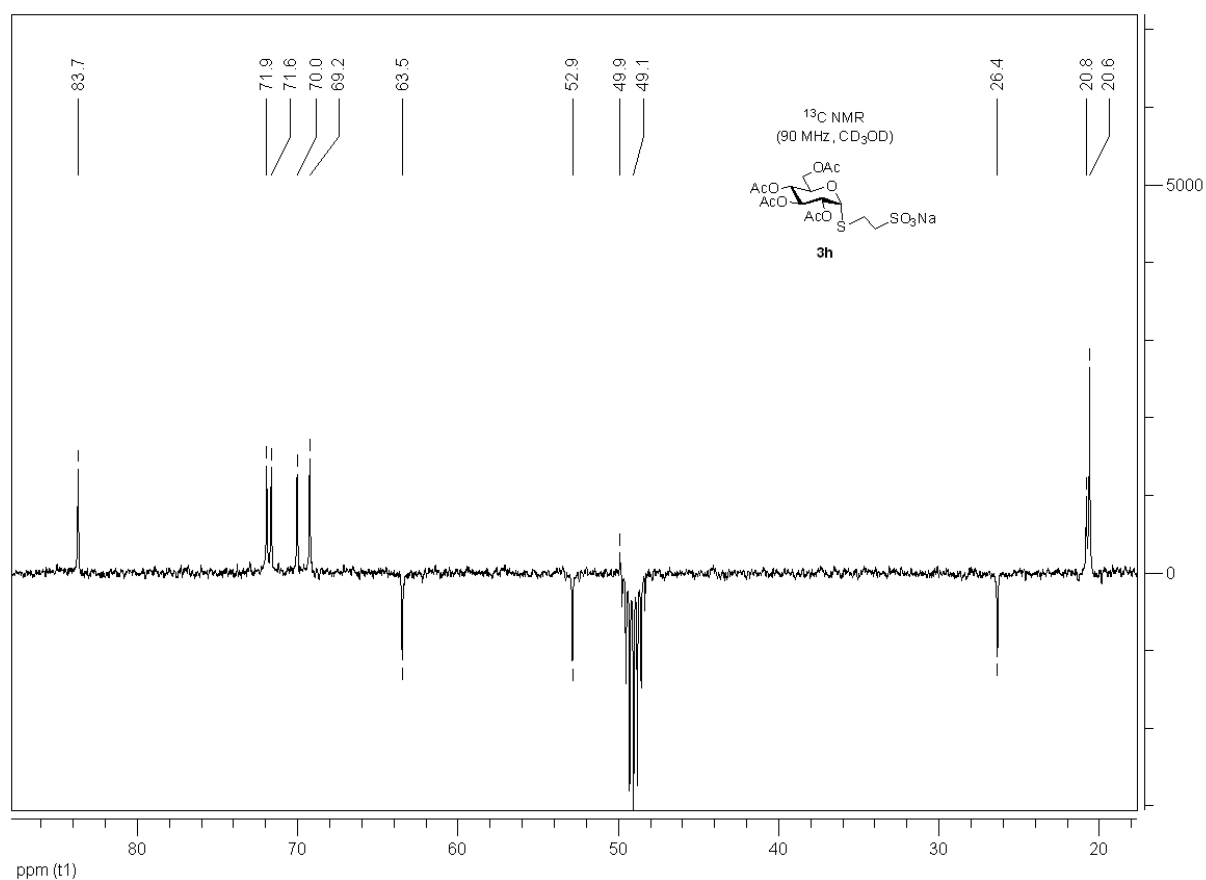



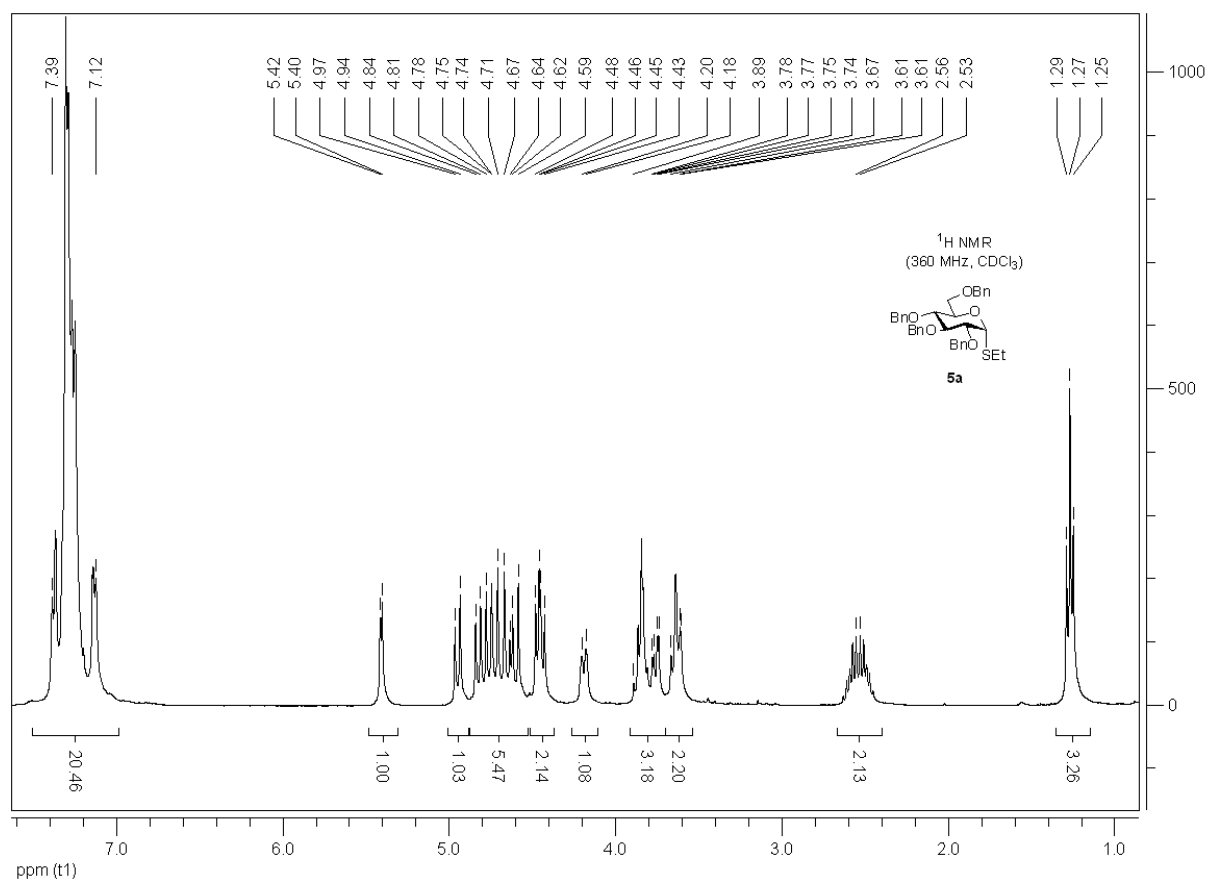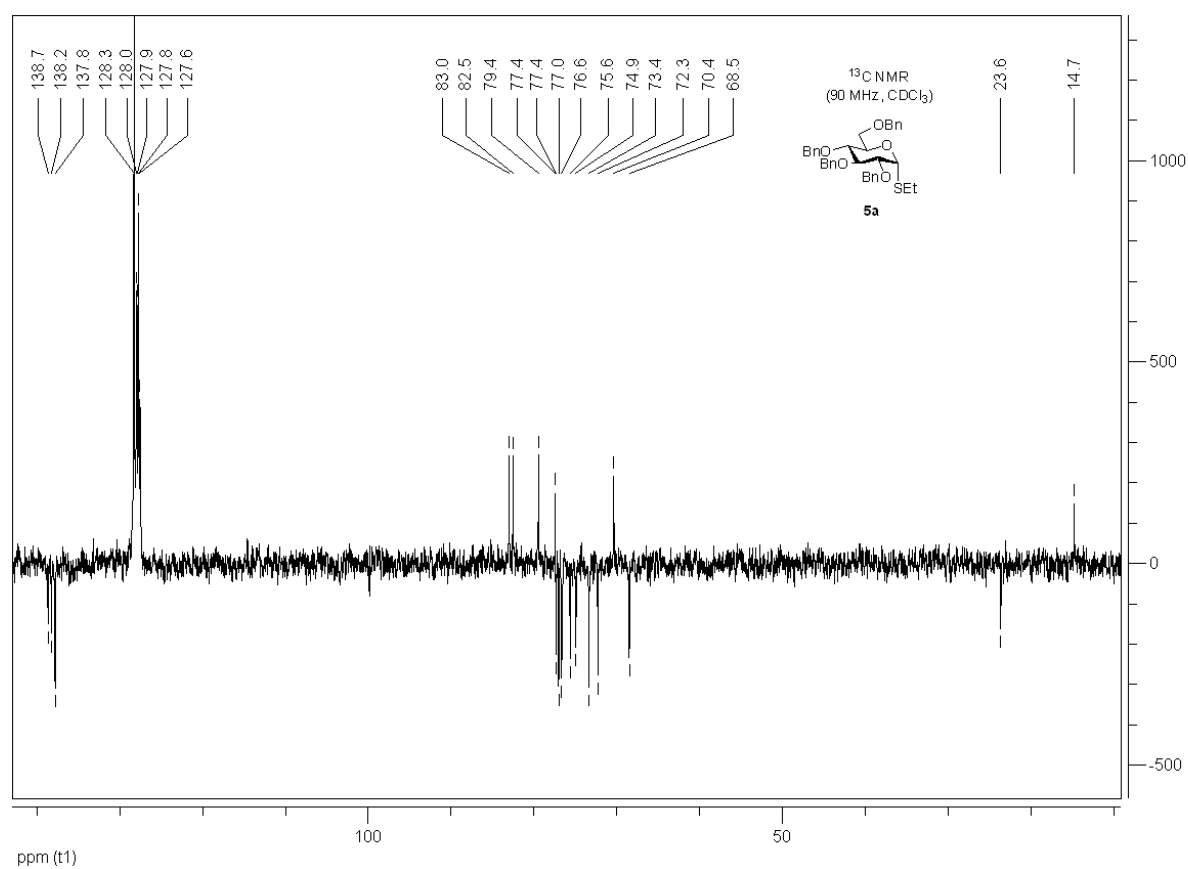

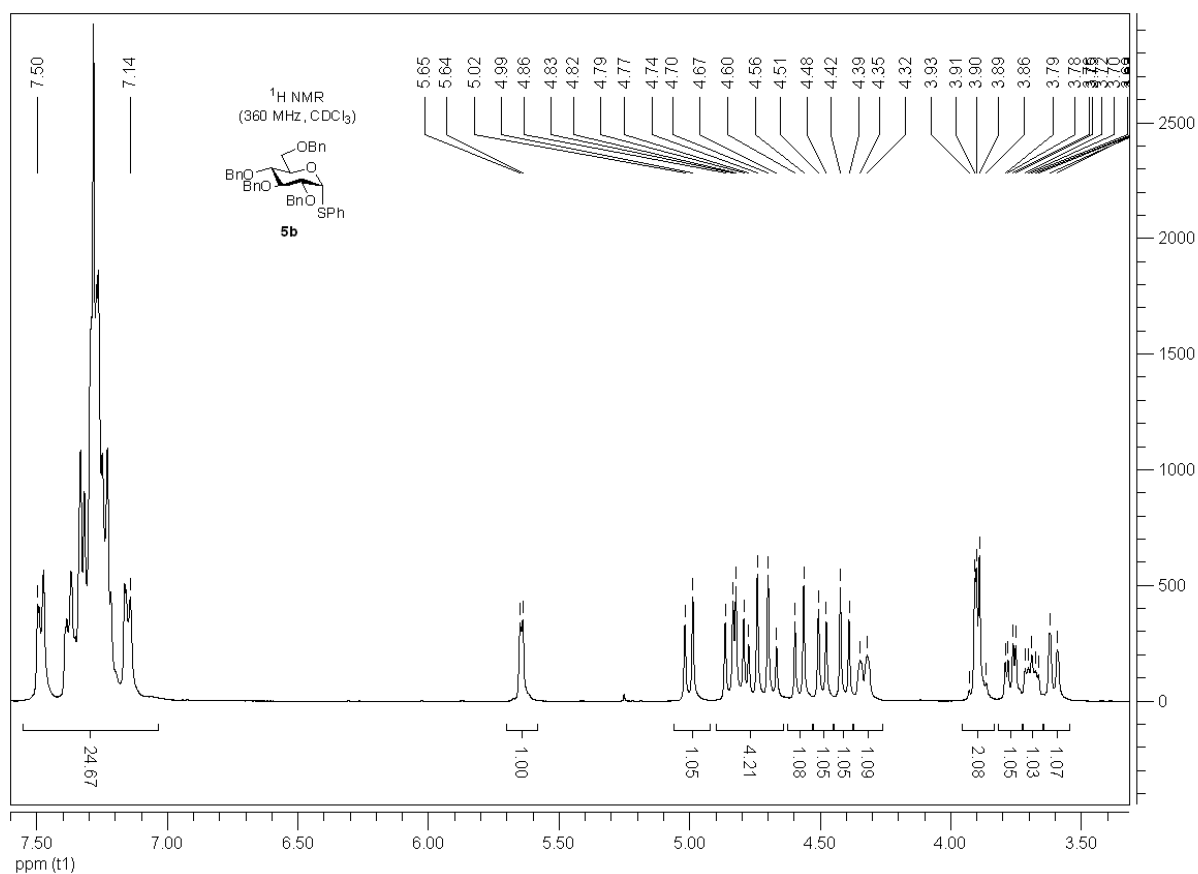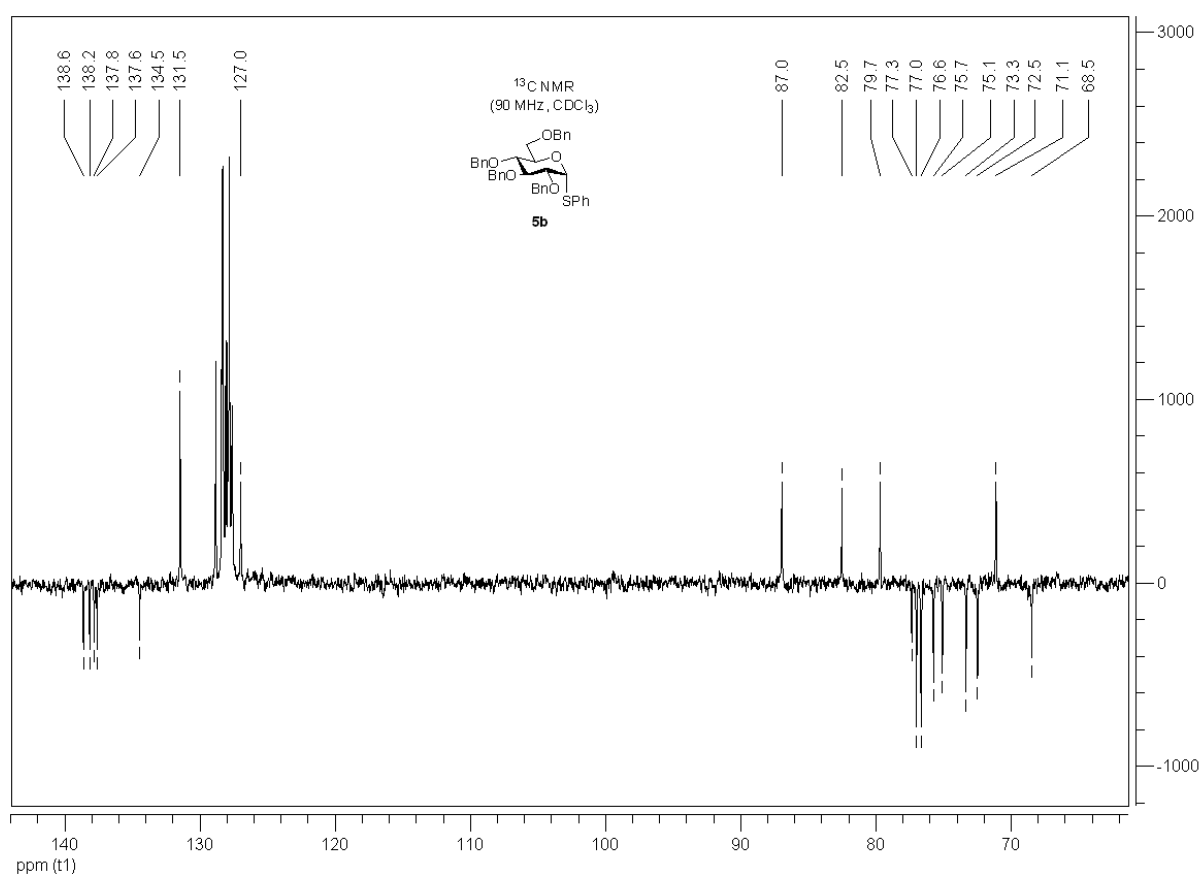

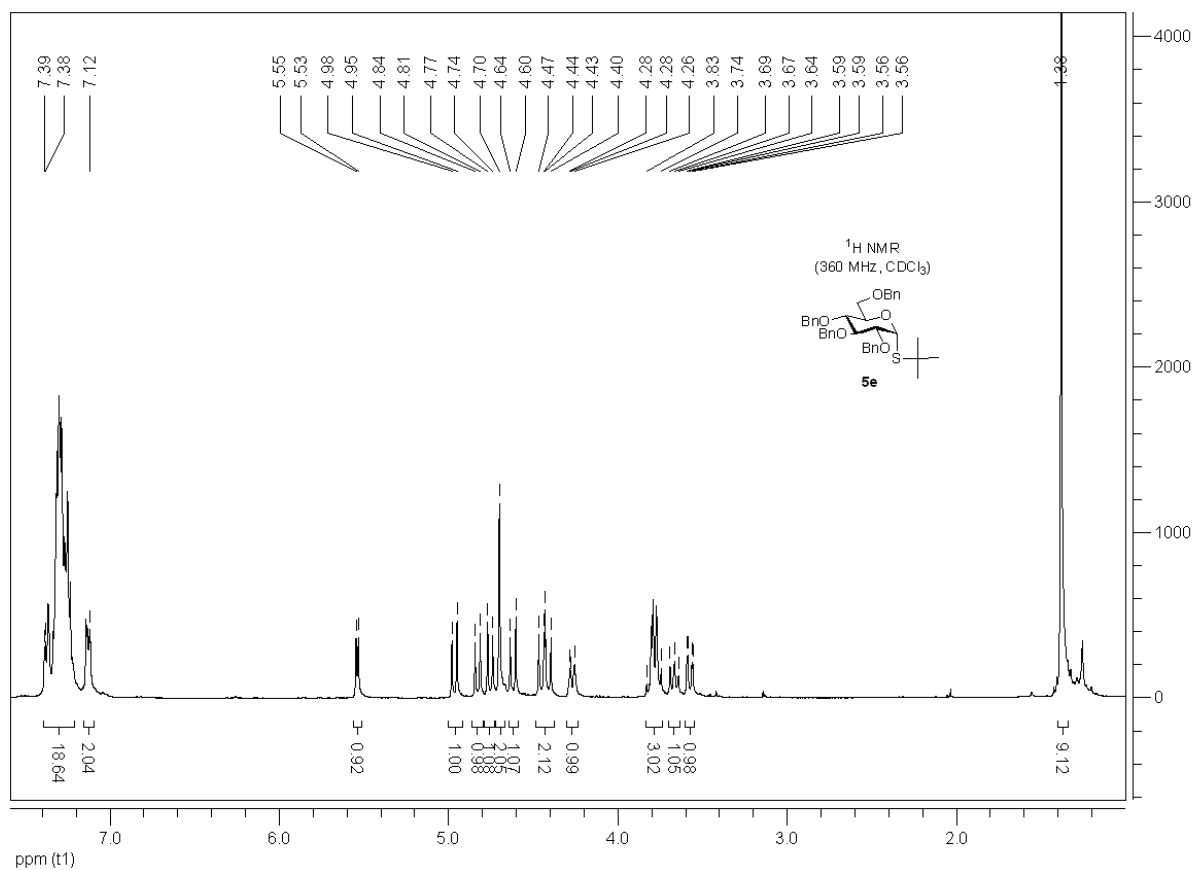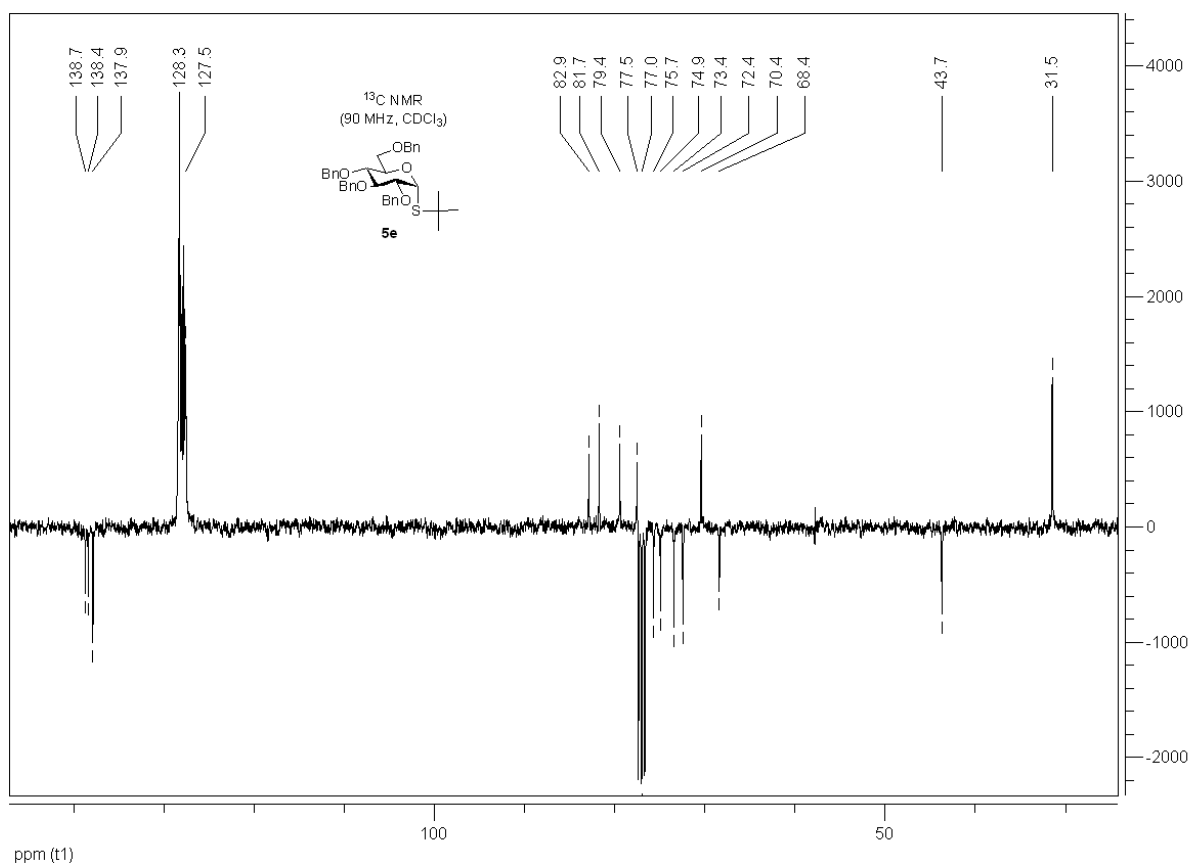

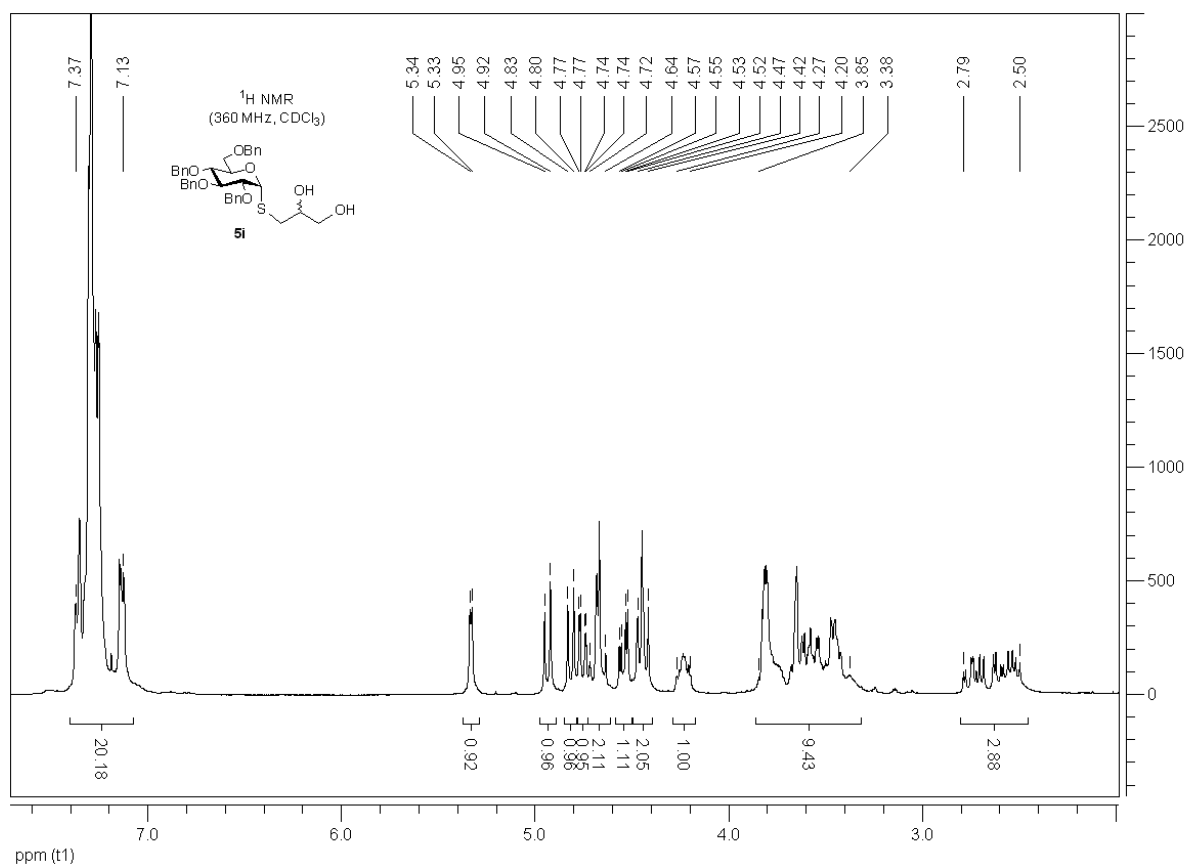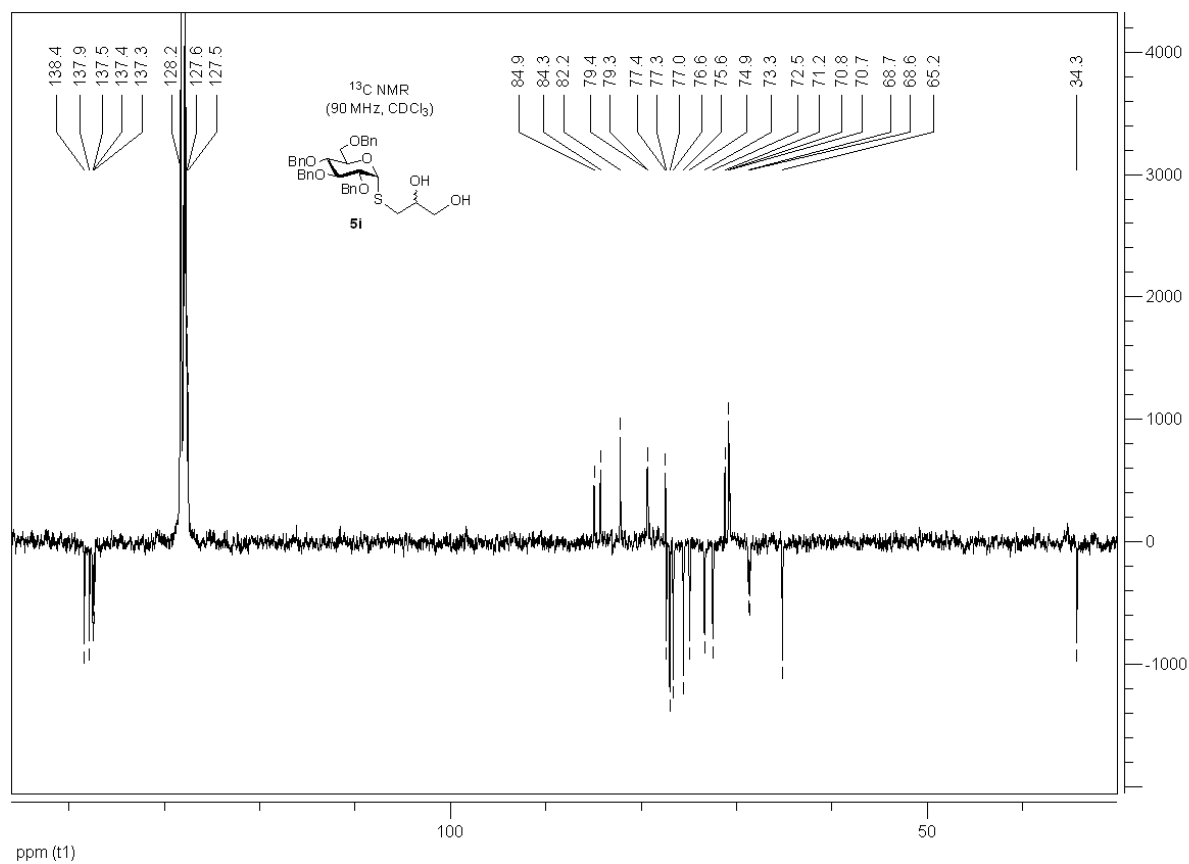

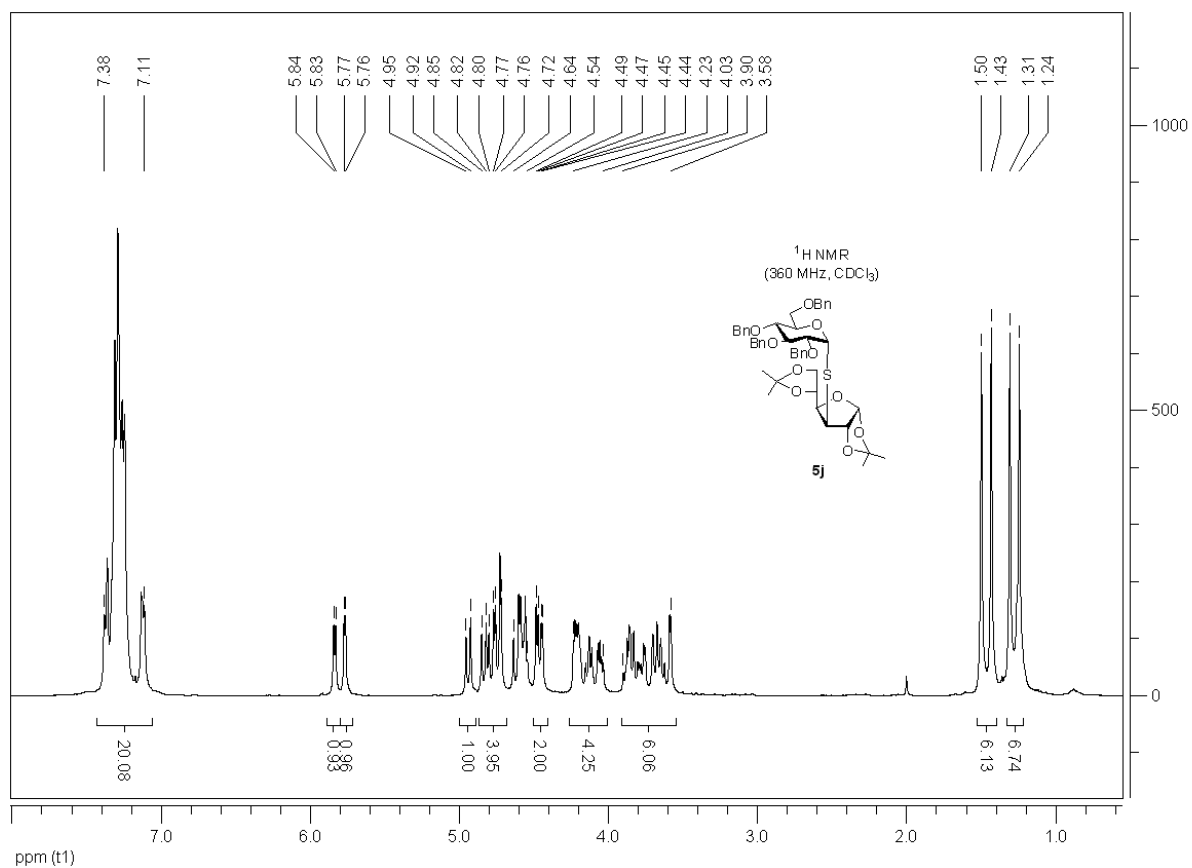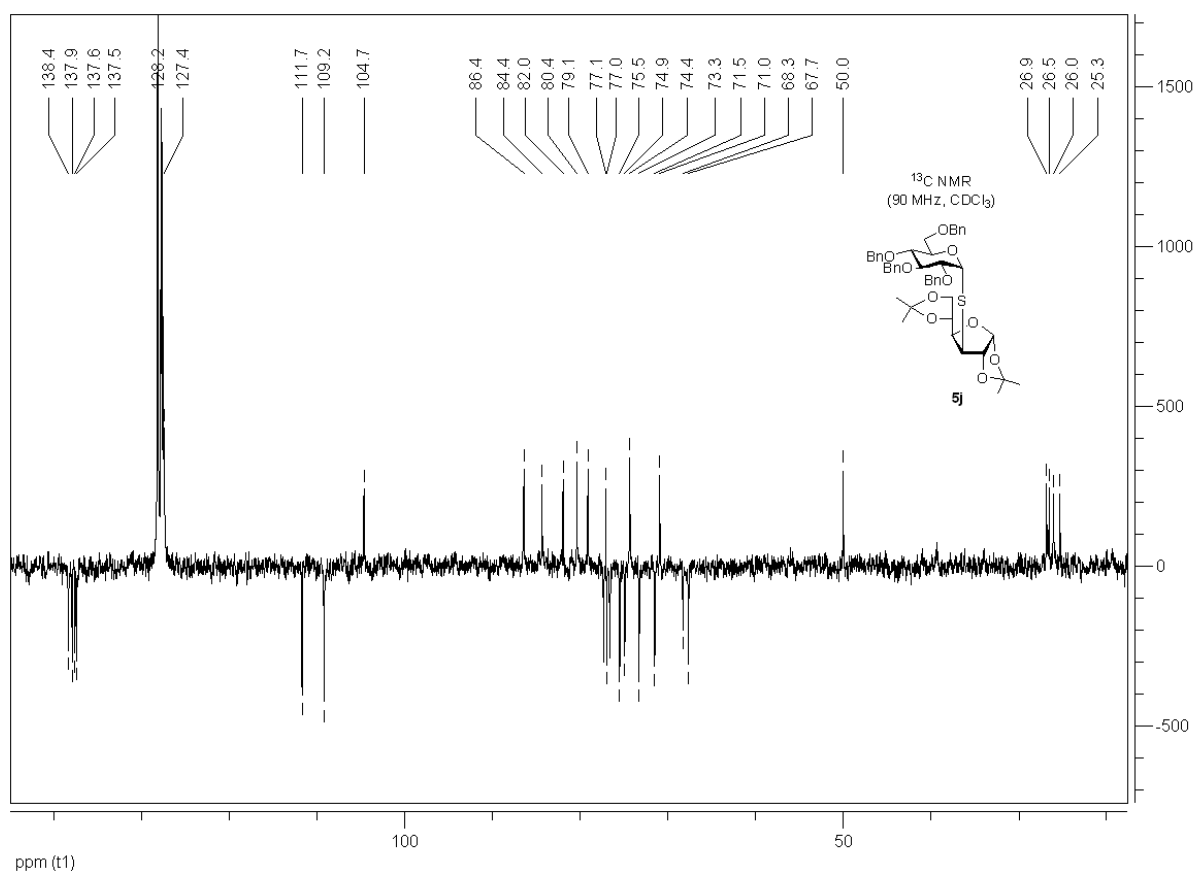

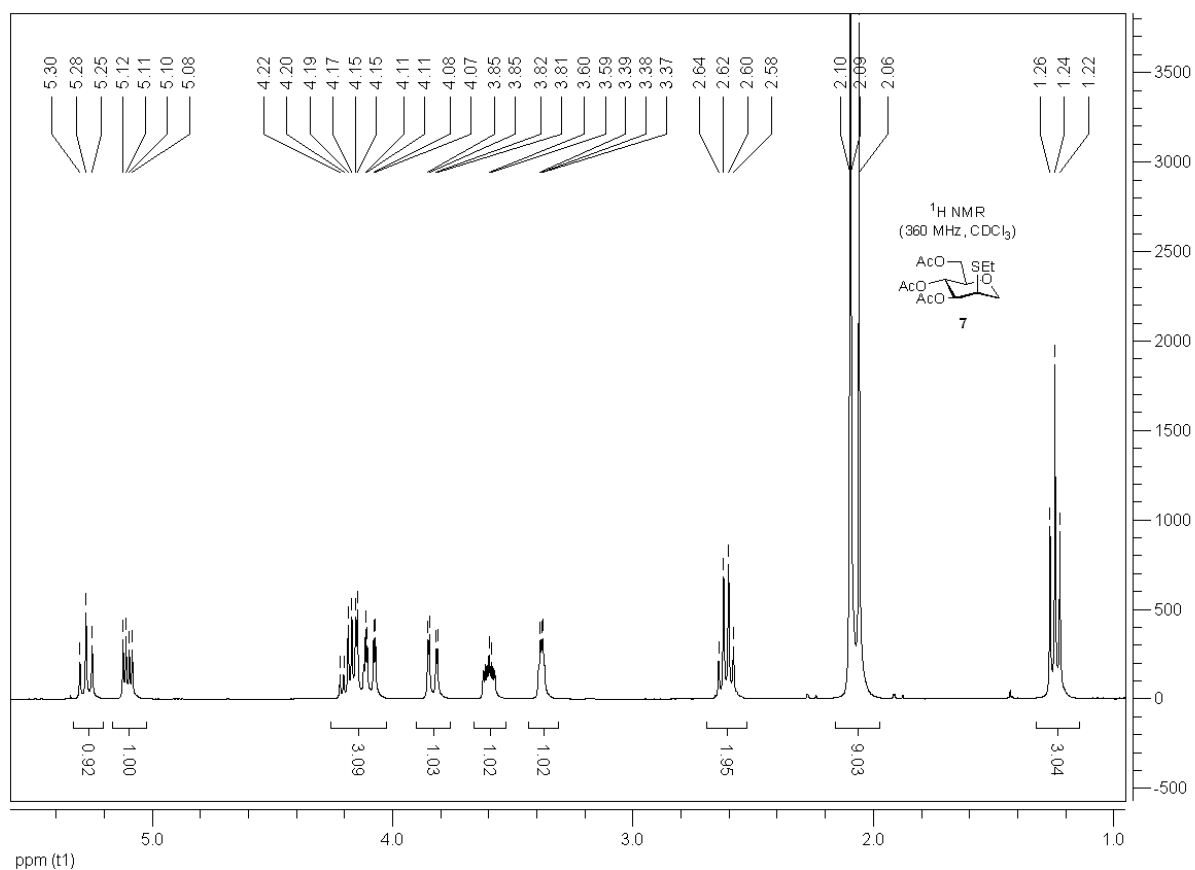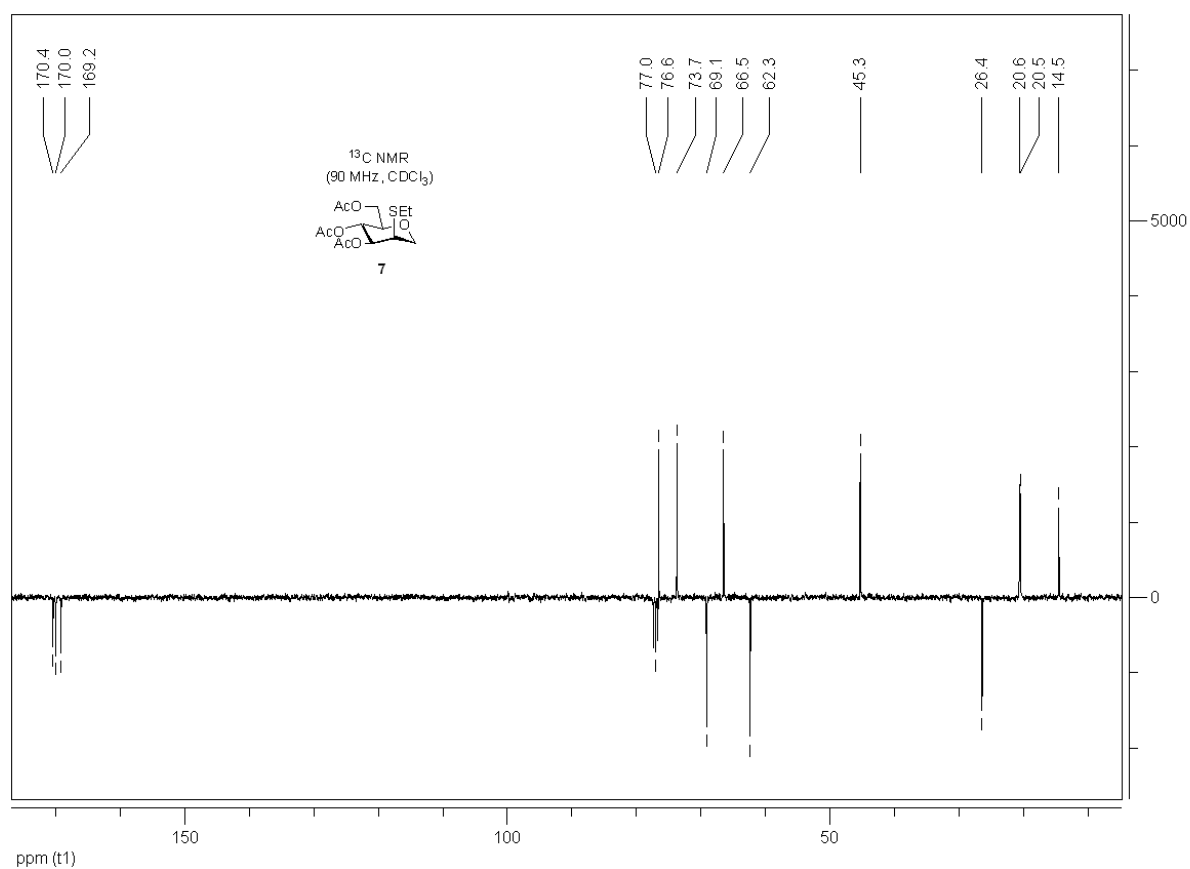

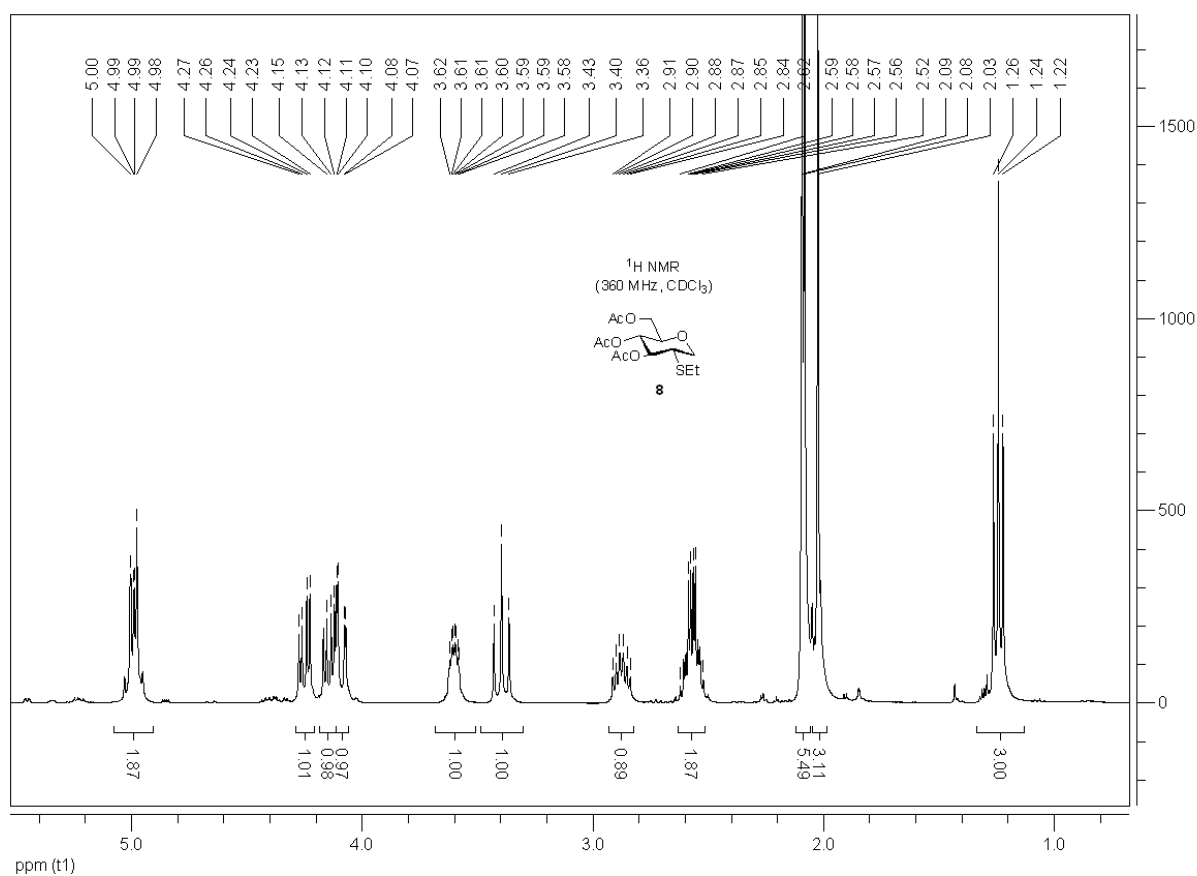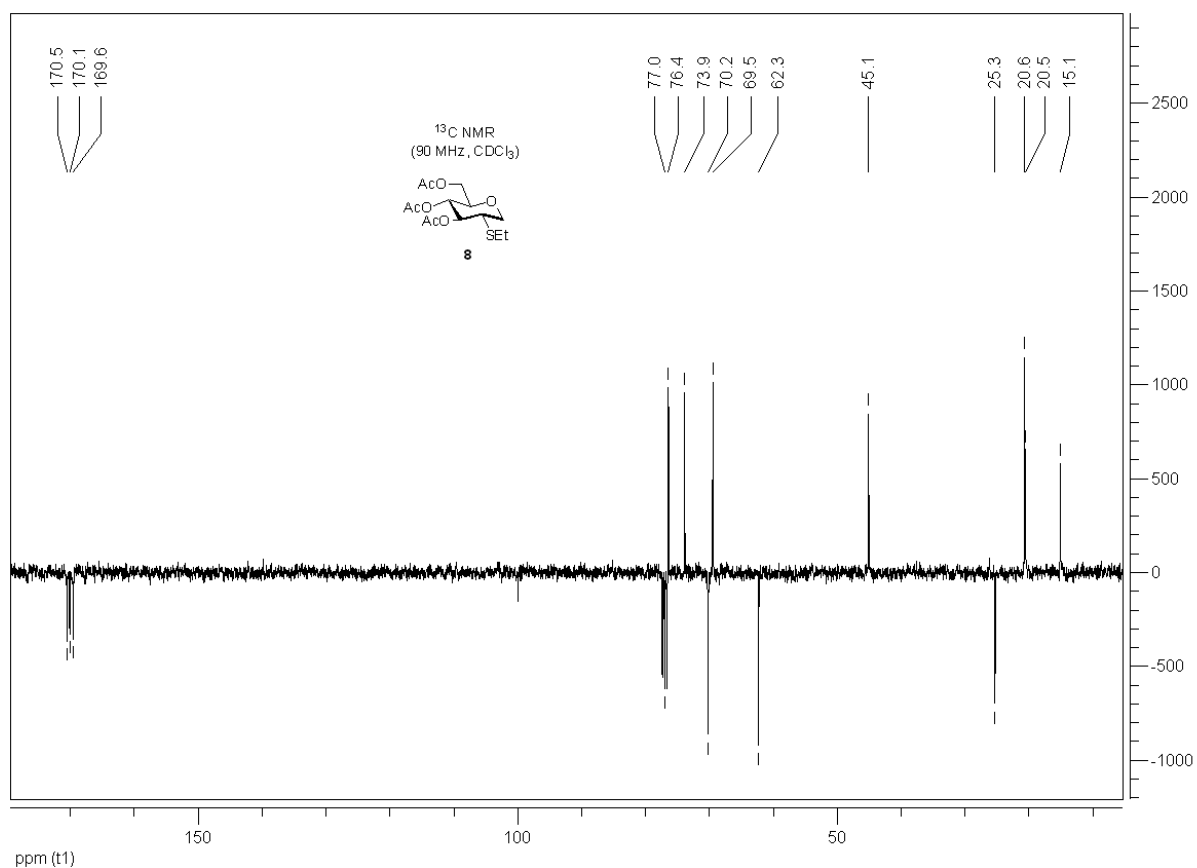

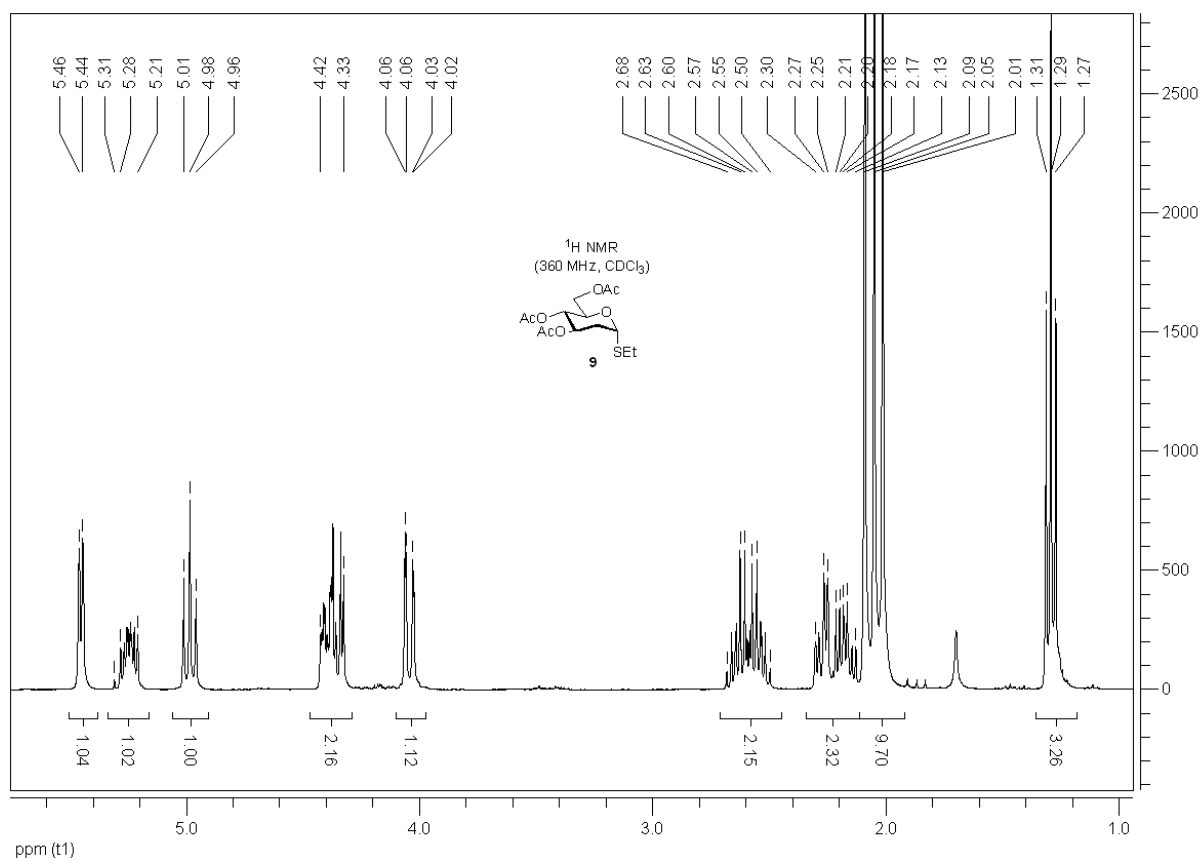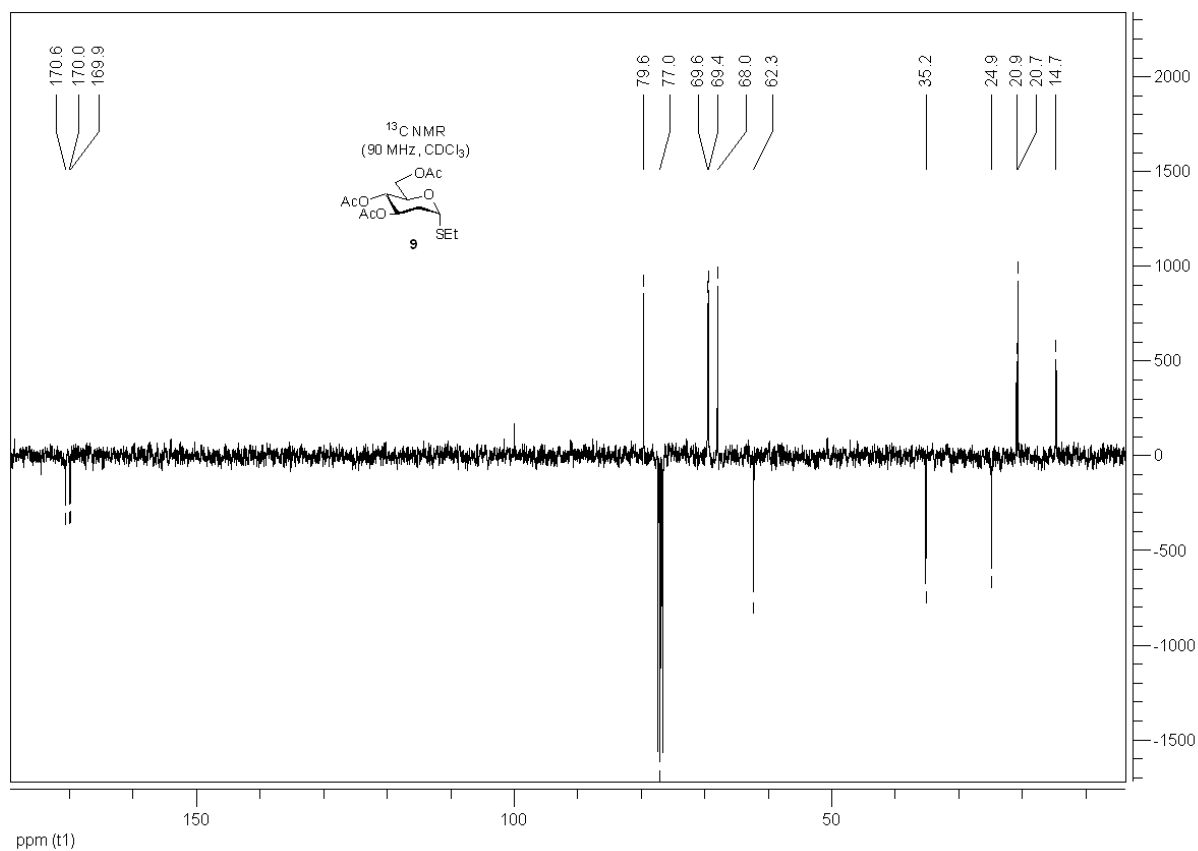



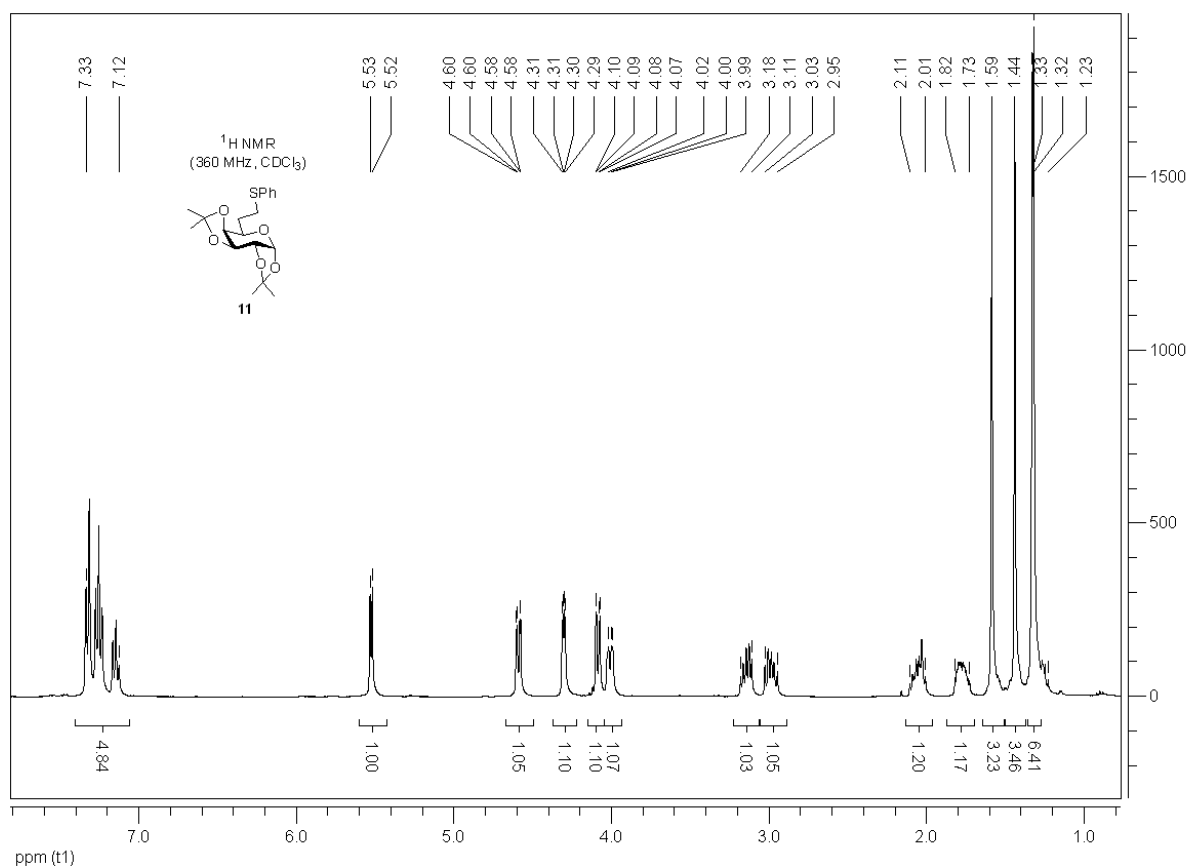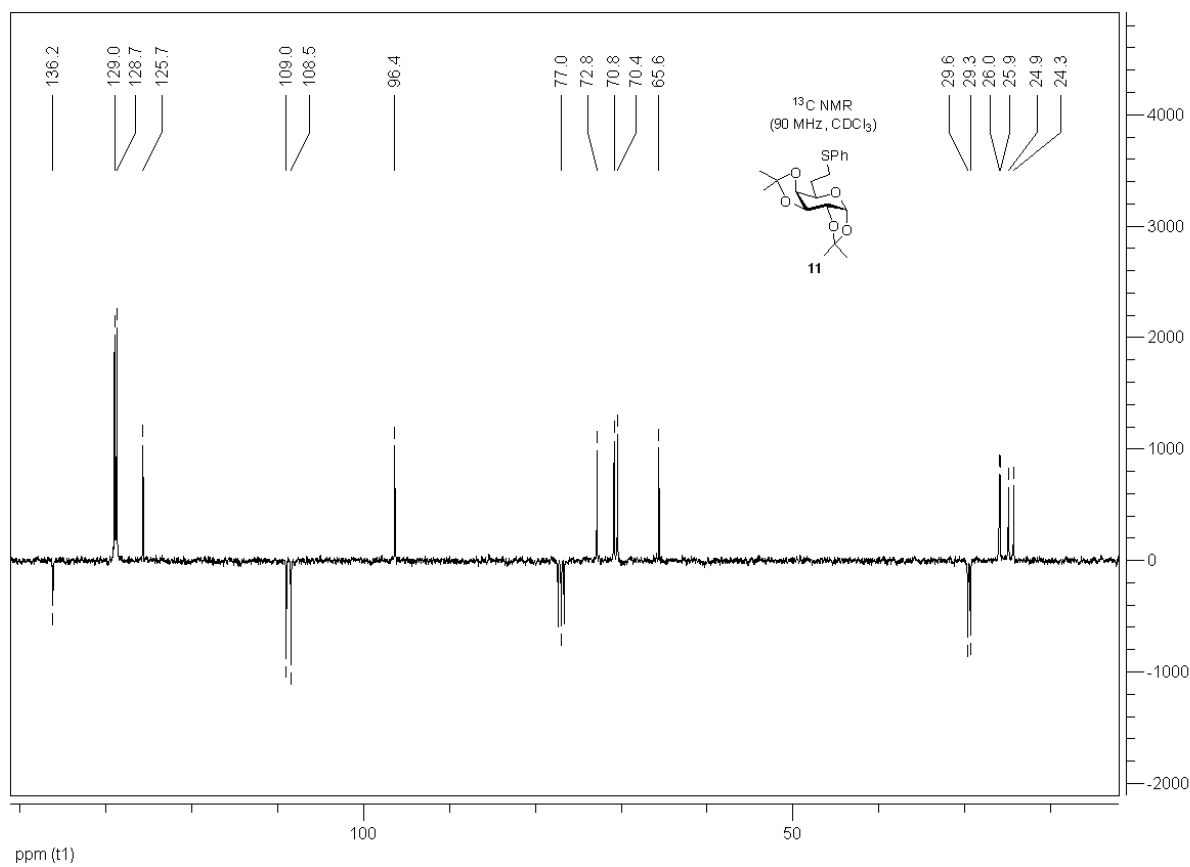

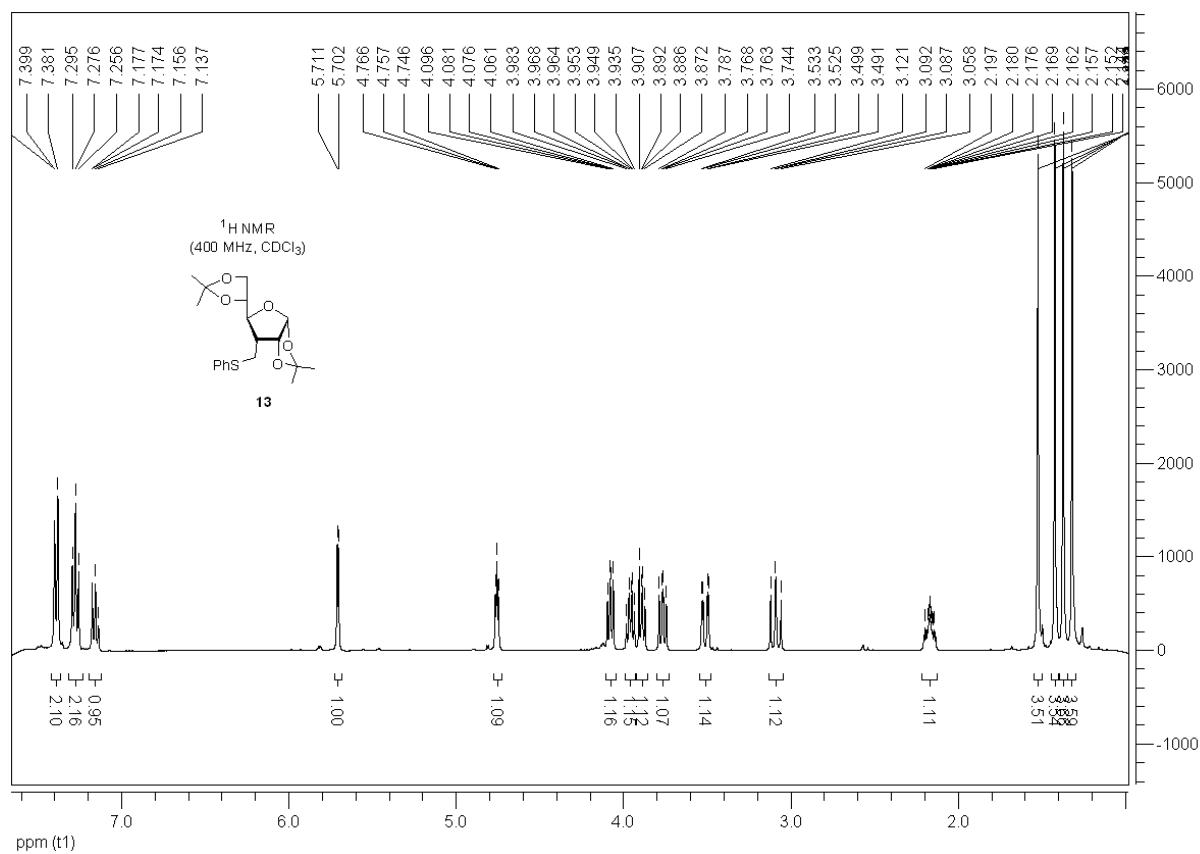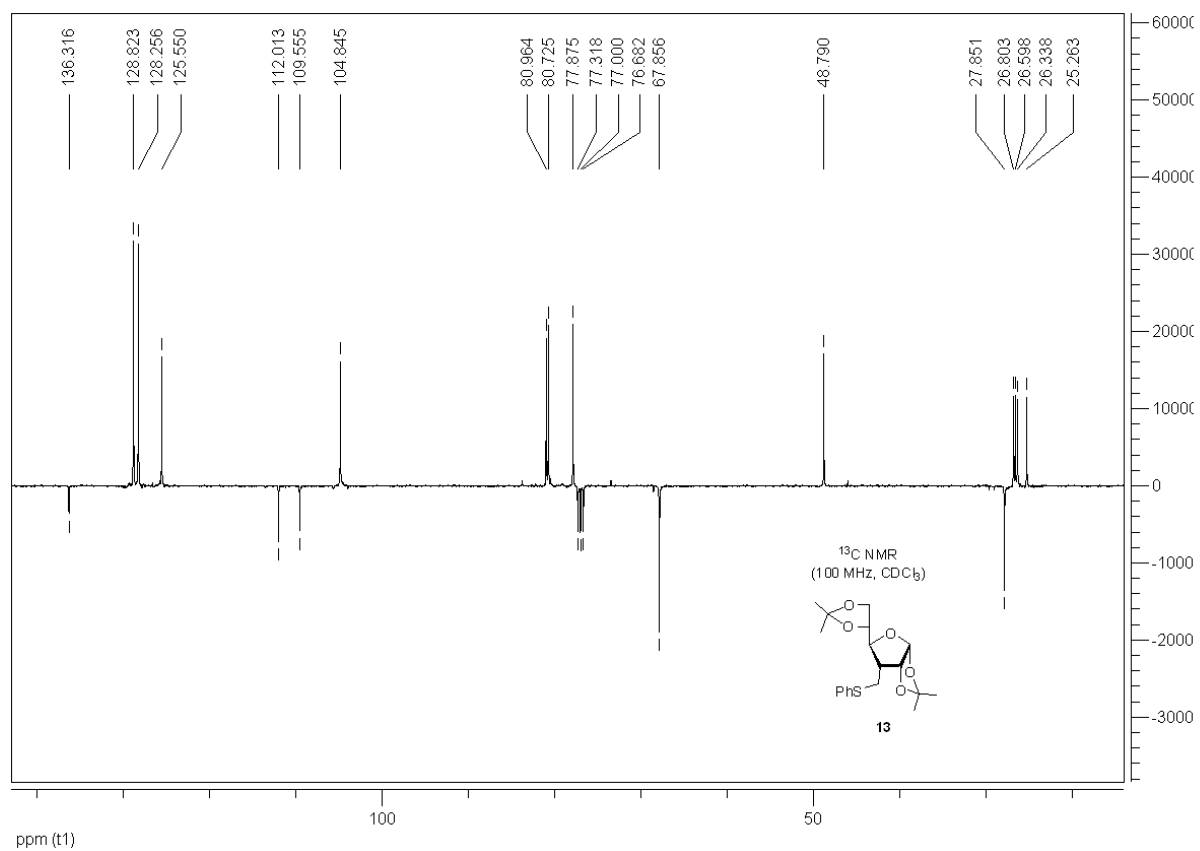

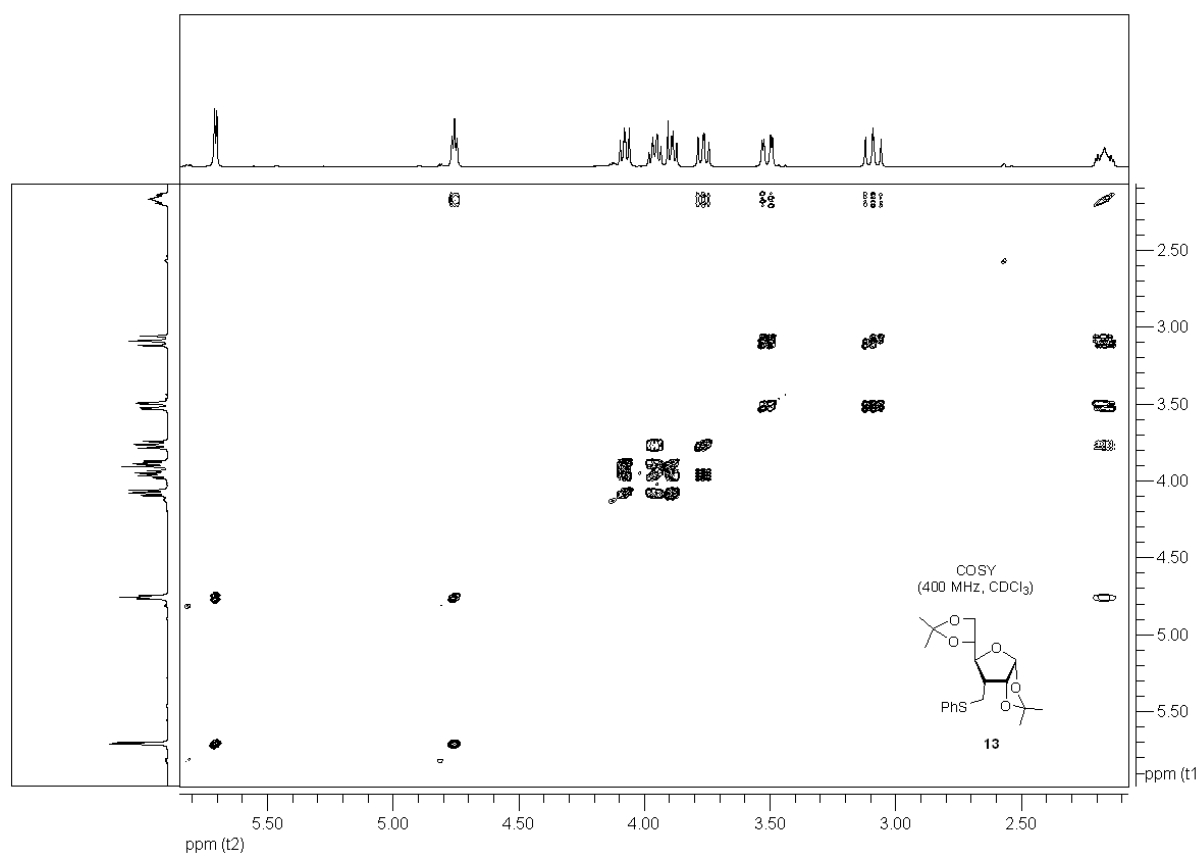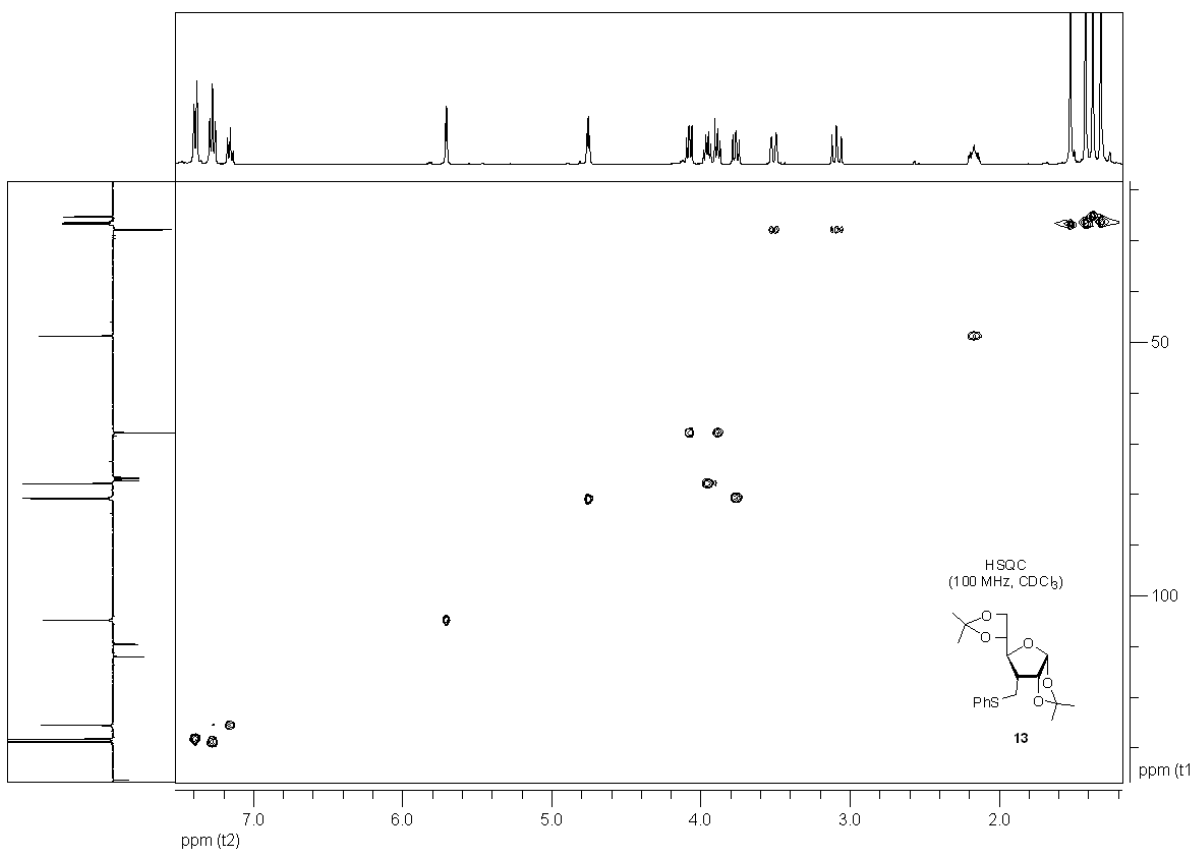

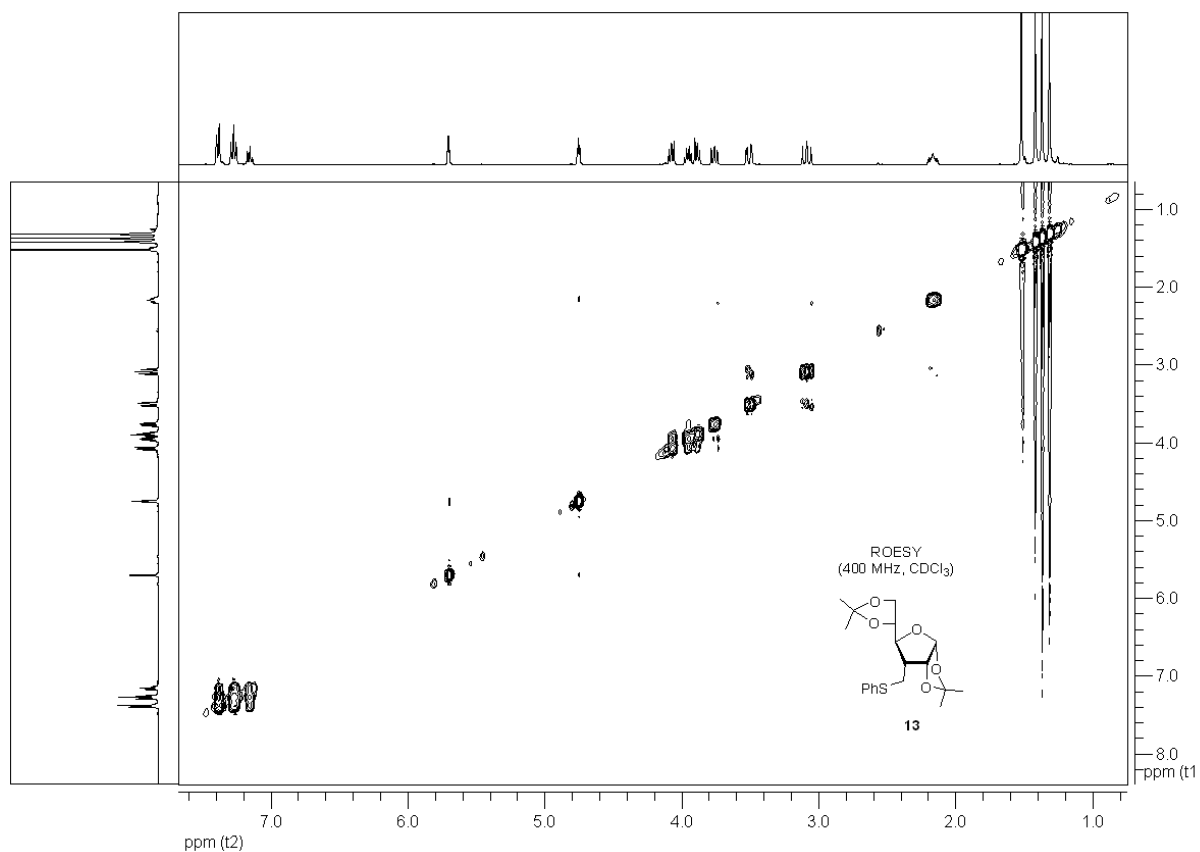

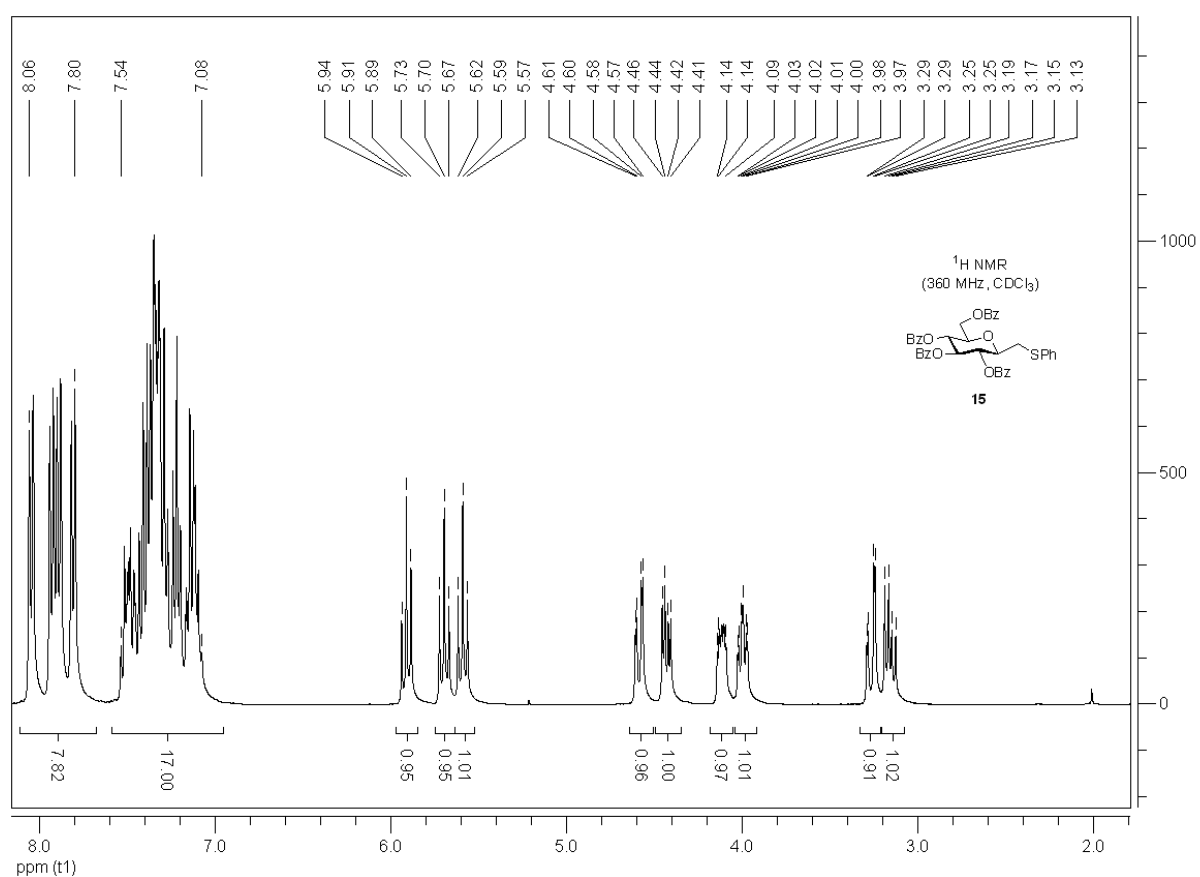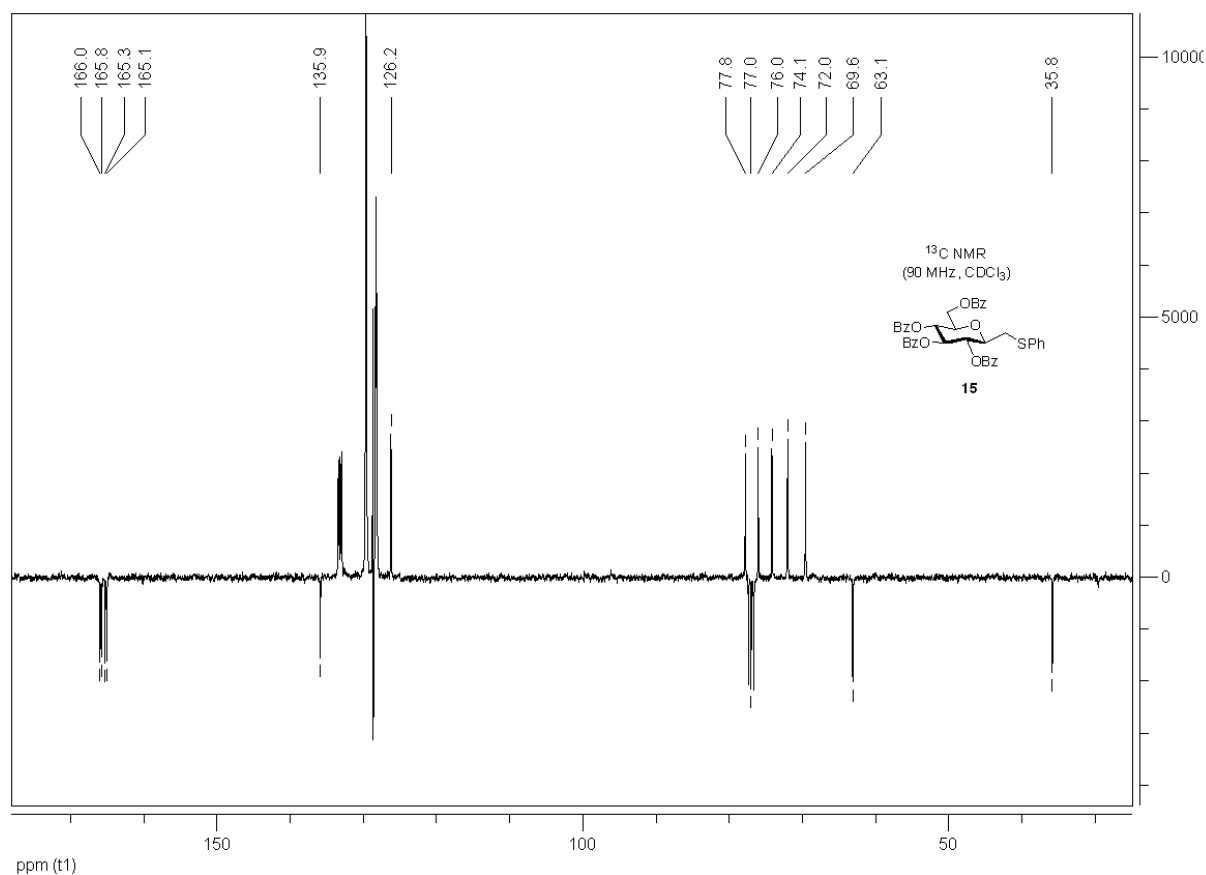

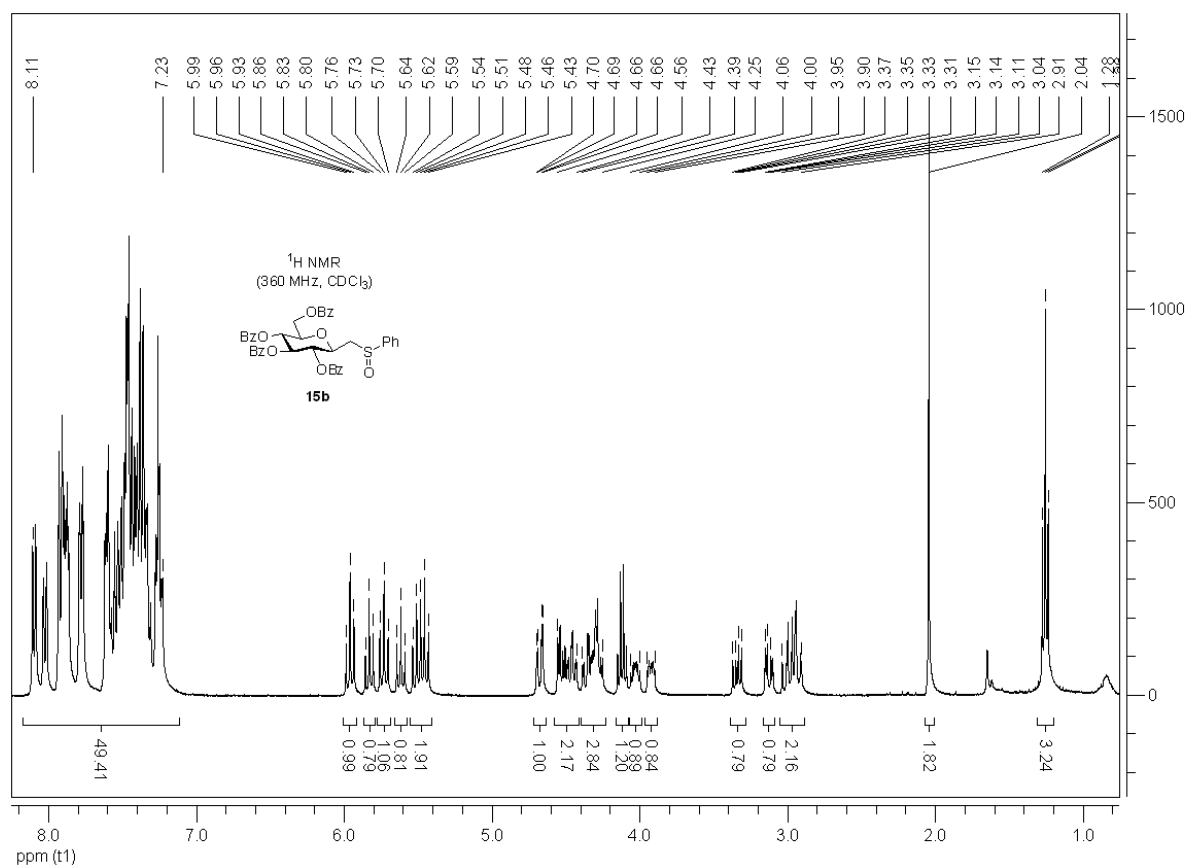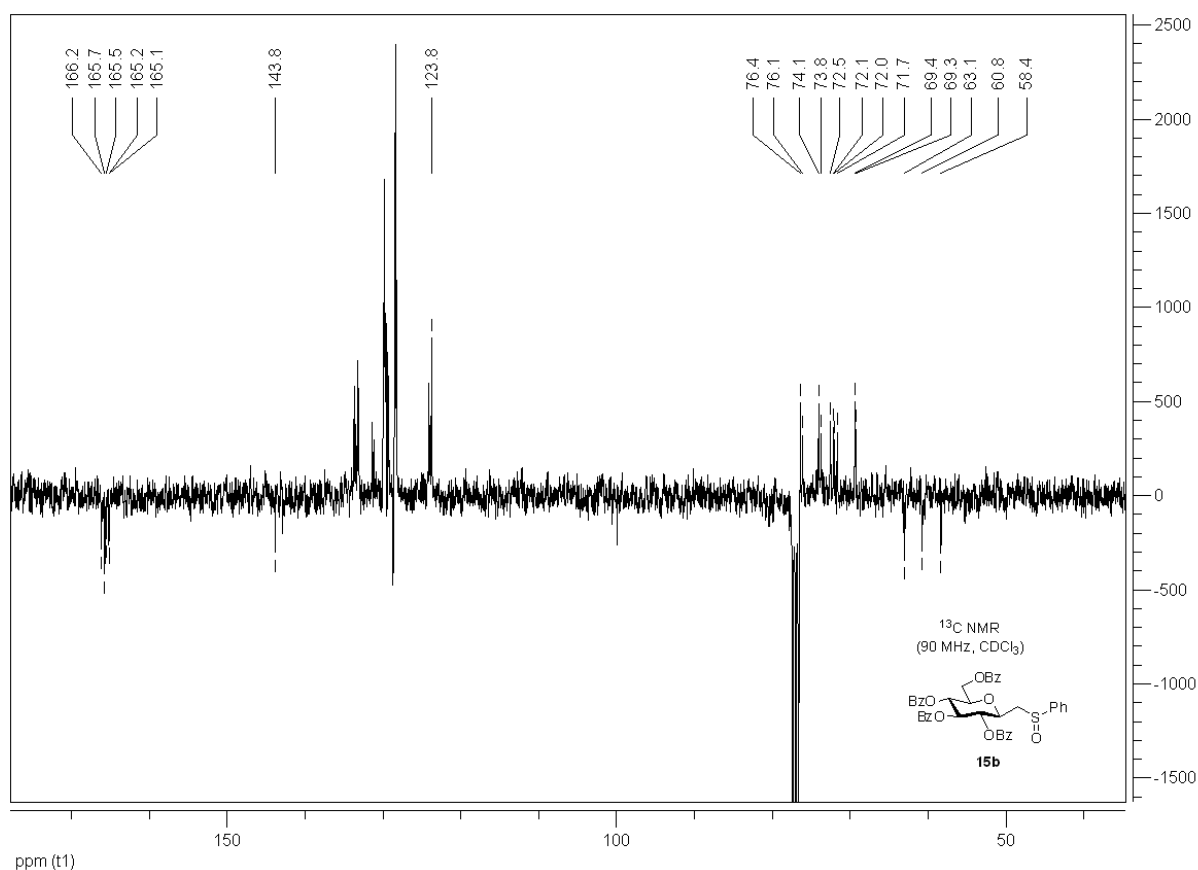

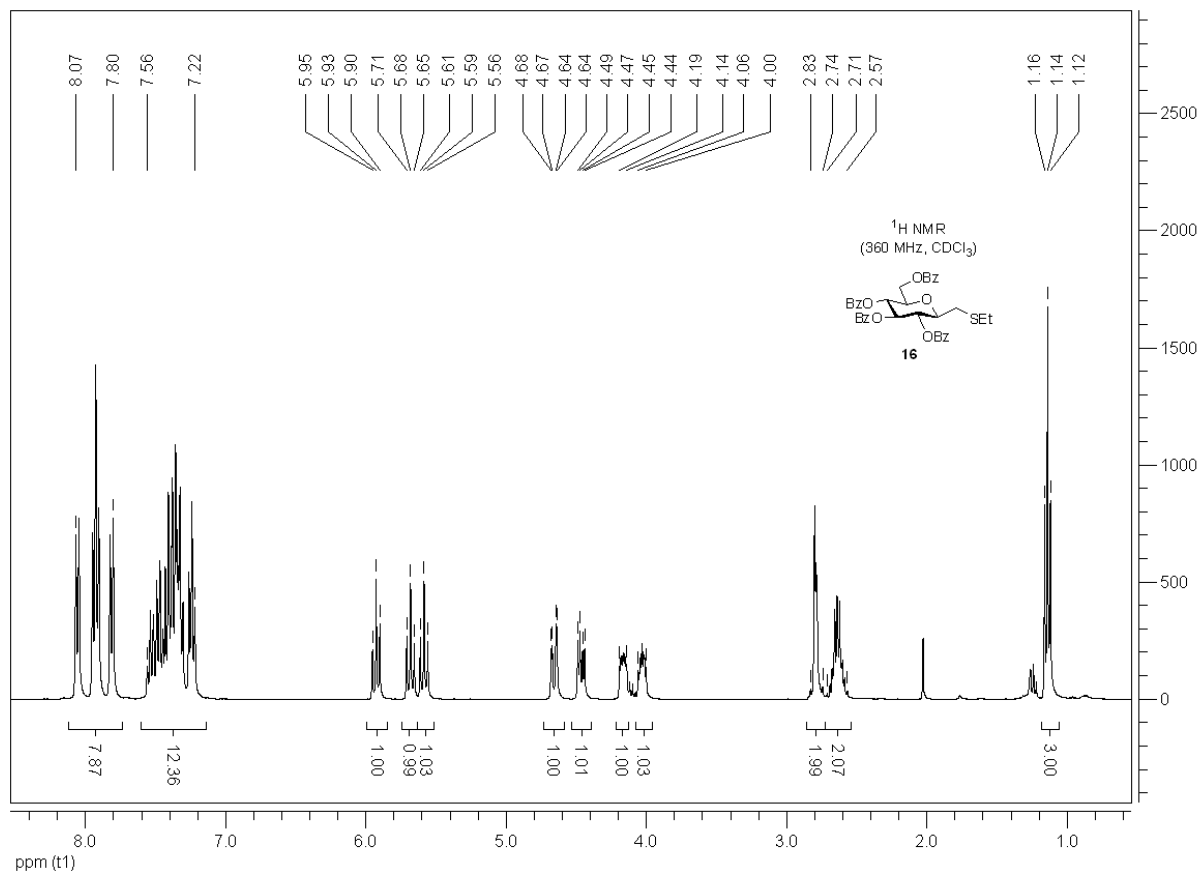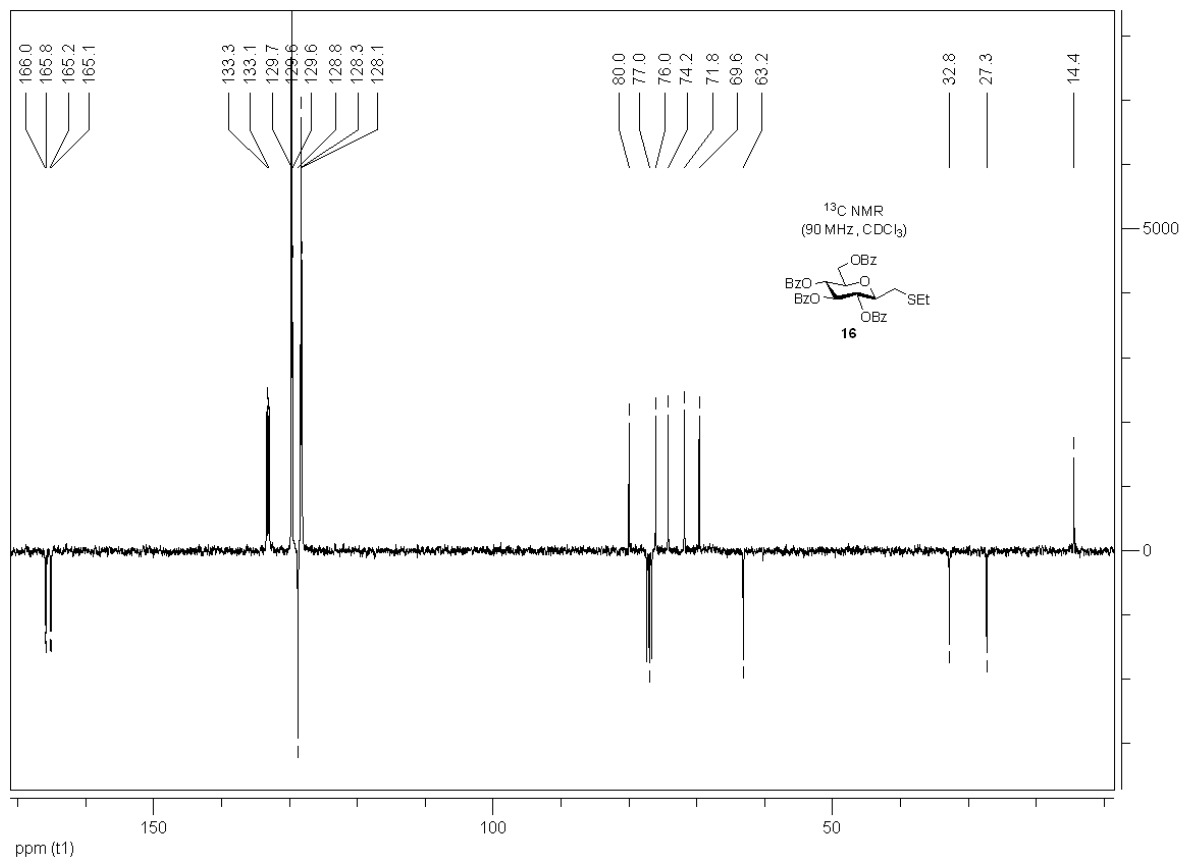

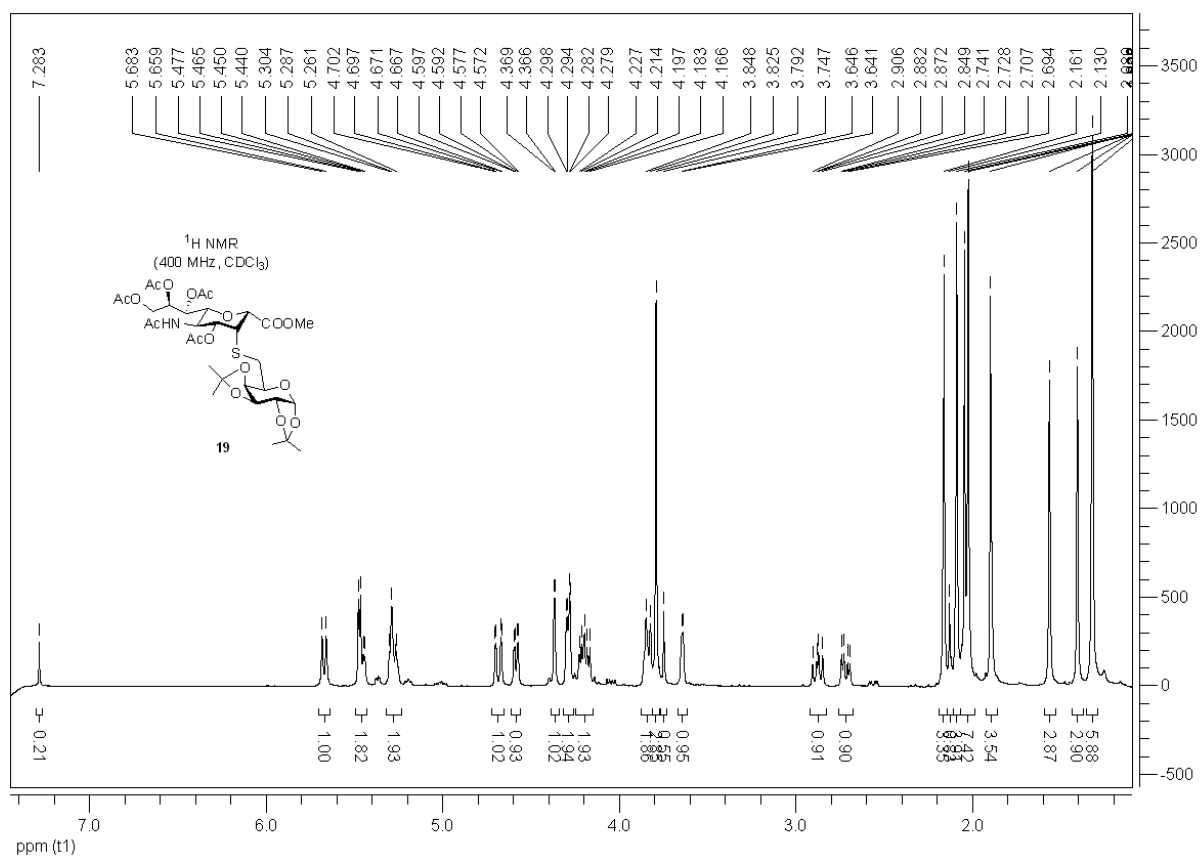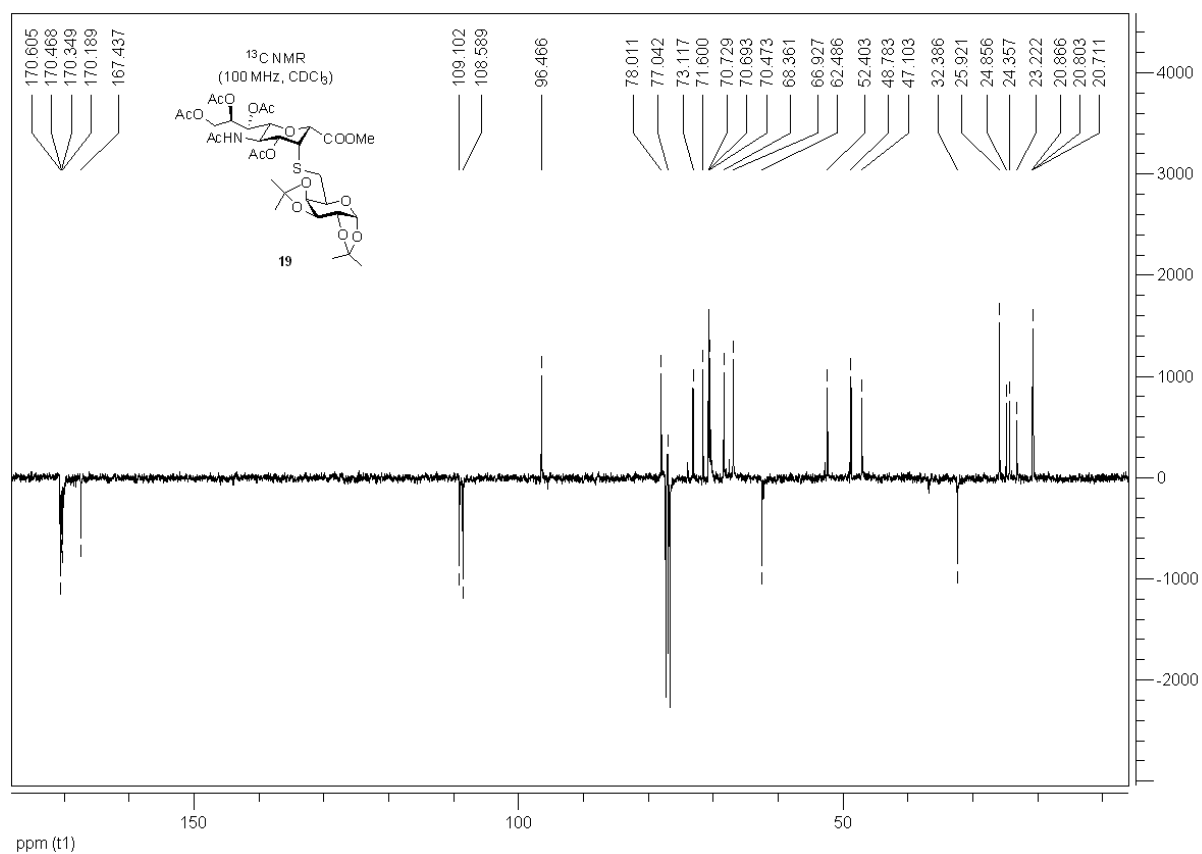



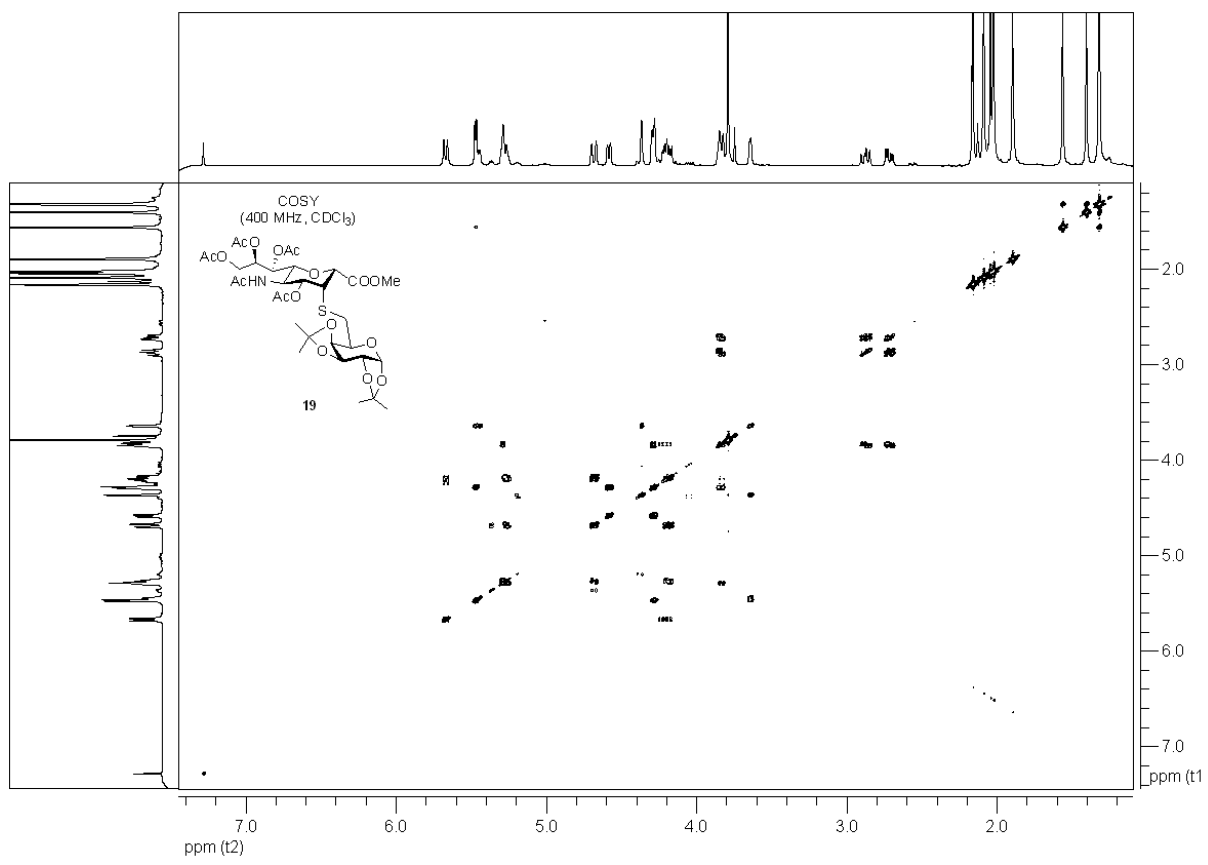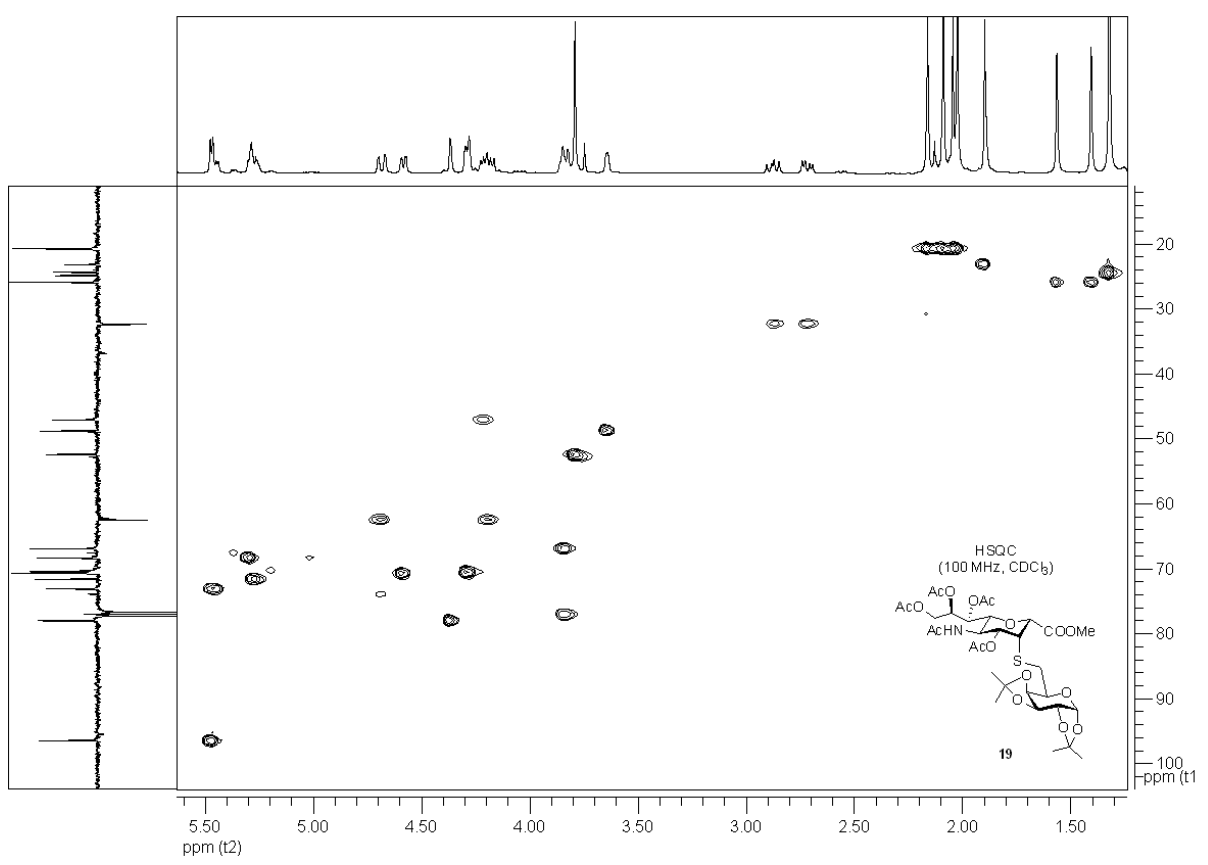

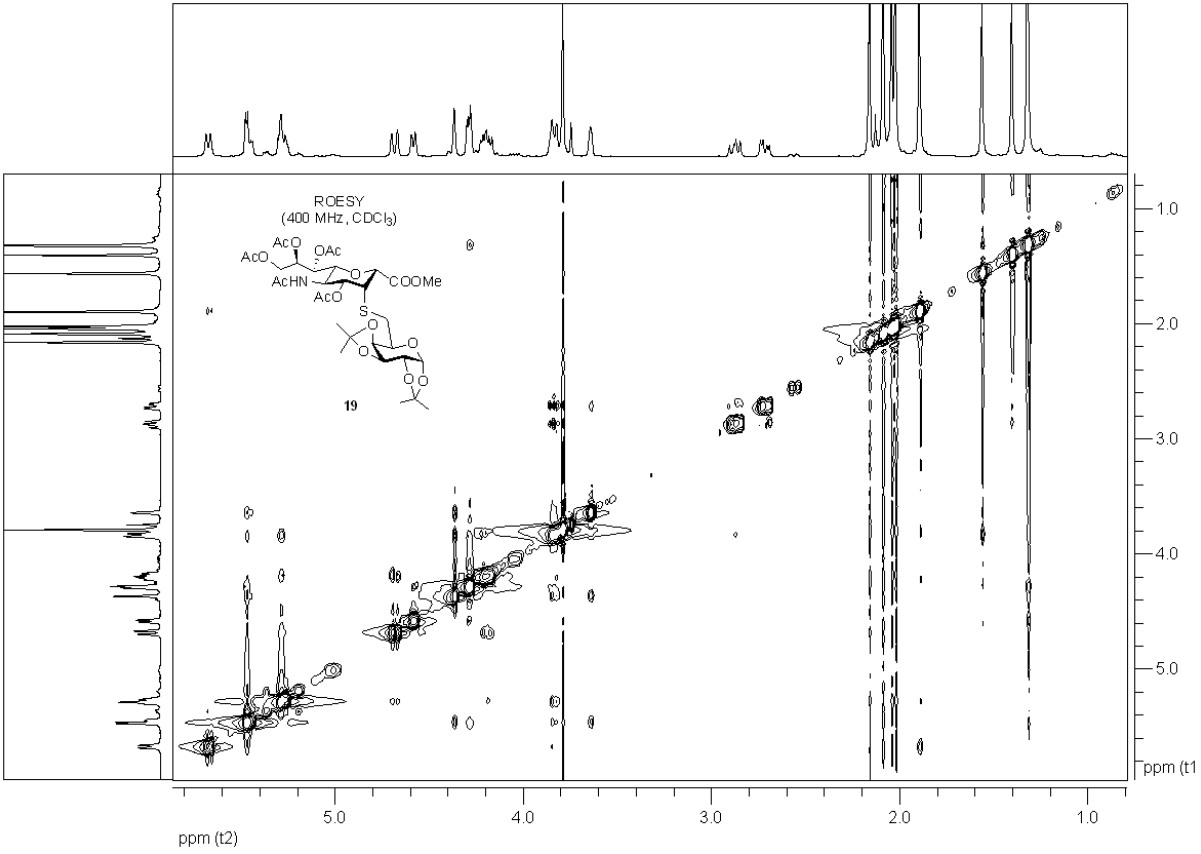

Supplement: c3ob40547h.pdf [file c3ob40547h.pdf]
